# Supplementary material for: The synthesis of NiII and AlIII 10-azacorroles through coordination-induced cyclisation involving 1,2-migration
Source: Royal Society of Chemistry journal article supplement (doi:10.1039/c5cc10247b), 2016-01-01
Supplement: c5cc10247b1.pdf [file c5cc10247b1.pdf]

## Supporting Information

# Synthesis of Ni<sup>II</sup> and Al<sup>III</sup> 10-azacorroles through coordination-induced cyclisation involving 1,2-migration

Hiroto Omori, Satoru Hiroto\* and Hiroshi Shinokubo\*

*Department of Applied Chemistry, Graduate School of Engineering, Nagoya University,  
Chikusa-ku, Nagoya 464-8603, Japan*

E-mail: hshino@apchem.nagoya-u.ac.jp; hiroto@apchem.nagoya-u.ac.jp

### Table of Contents

|                                     |     |
|-------------------------------------|-----|
| Instrumentation and Materials ..... | S2  |
| Synthesis and Compound Data .....   | S2  |
| NMR Spectra of Compounds .....      | S14 |
| Electrochemical Measurements .....  | S33 |
| Theoretical Calculations .....      | S34 |

## **Instrumentation and Materials**

<sup>1</sup>H NMR (500 MHz) and <sup>13</sup>C NMR (126 MHz) spectra were recorded on a Bruker AVANCE III HD spectrometer, and chemical shifts were reported as the delta scale in ppm relative to CHCl<sub>3</sub> (δ = 7.260 ppm), acetone-*d*<sub>6</sub> (δ = 2.050 ppm) for <sup>1</sup>H NMR and CDCl<sub>3</sub> (δ = 77.16 ppm), acetone-*d*<sub>6</sub> (δ = 29.84 ppm) for <sup>13</sup>C NMR. UV/vis/NIR absorption spectra were recorded on a Shimadzu UV-2550 or JASCO V670 spectrometer. Mass spectra were recorded on a Bruker microTOF using positive mode ESI-TOF method for acetonitrile solutions. Unless otherwise noted, materials obtained from commercial suppliers were used without further purification. Compounds **1a** was prepared according to the previous report.<sup>1</sup>

## **Synthesis and Compound Data**

### ***meso*-Mesityl-α,α'-dichlorodipyrin **1b****

A two-necked flask containing *meso*-mesityl-dipyrromethane (1.32 g, 5.00 mmol) was evacuated and then refilled with N<sub>2</sub>. To the flask, dry THF (75.0 mL) was added and the solution was cooled to −78 °C. After *N*-chlorosuccinimide (1.34 g, 10.0 mmol) was added to the solution, the mixture was stirred for 1 h. Then 2,3-dichloro-5,6-dicyano-1,4-benzoquinone (DDQ, 1.14 g, 5.02 mmol) was added. The resulting mixture was stirred at −78 °C for 10 min then warmed to room temperature. After stirring for additional 20 min, the reaction mixture was filtered through a short pad of alumina column (EtOAc as an eluent) and then evaporated. Purification by silica-gel column chromatography with CH<sub>2</sub>Cl<sub>2</sub>/hexane afforded the title compound in 57% (946 mg, 2.86 mmol) as a yellow solid. <sup>1</sup>H NMR (CDCl<sub>3</sub>): δ 12.1 (br s, 1H, NH), 6.91 (s, 2H, Mes), 6.32 (d, *J* = 4.0 Hz, 2H, pyrrole-β), 6.18 (d, *J* = 4.0 Hz, 2H,

pyrrole-β) 2.34 (s, 3H, *p*-Me), 2.07 (s, 6H, *o*-Me) ppm; <sup>13</sup>C NMR (CDCl<sub>3</sub>): δ 141.4, 139.0, 138.5, 138.1, 137.0, 131.6, 128.8, 128.1, 117.2, 21.3, 20.0 ppm; HR-MS (ESI-MS): *m/z* = 331.0771, calcd for (C<sub>18</sub>H<sub>17</sub>N<sub>2</sub>Cl<sub>2</sub>)<sup>+</sup> = 331.0763 [(M + H)<sup>+</sup>].

***N,N*-Bis(*meso*-mesityl-1-bromodipyririn-9-yl)-*N*-benzylamine 2a**

A Schlenk tube containing **1a** (104 mg, 248 μmol), Pd<sub>2</sub>(dba)<sub>3</sub>•CHCl<sub>3</sub> (6.51 mg, 6.29 μmol), Xantphos (7.53mg, 12.8 μmol), and KO<sup>t</sup>Bu (71.3 mg, 635 μmol) was evacuated and then refilled with N<sub>2</sub>. To the tube, benzylamine (68.0 μL, 624 μmol), and dry and degassed toluene (3.50 mL) were added. The mixture was stirred at 80 °C for 12 h. The reaction mixture was passed through a short plug of silica (CHCl<sub>3</sub> as an eluent) and evaporated. Purification by silica-gel column chromatography with CHCl<sub>3</sub>/hexane afforded the title compound in 64% (62.5 mg, 79.6 μmol) as a black solid. <sup>1</sup>H NMR (acetone-*d*<sub>6</sub>): δ 12.8 (br s, 2H, NH), 7.49 (d, *J* = 7.0 Hz, 2H, Ph), 7.40 (dd, *J*<sup>1</sup> = *J*<sup>2</sup> = 7.8 Hz, 2H, Ph), 7.29 (t, *J* = 7.5 Hz, 1H, Ph), 6.98 (s, 4H, Mes), 6.72 (d, *J* = 4.5 Hz, 2H, pyrrole-β), 6.53 (d, *J* = 4.5 Hz, 2H, pyrrole-β), 6.23 (d, *J* = 4.0 Hz, 2H, pyrrole-β), 5.93 (d, *J* = 4.0 Hz, 2H, pyrrole-β), 5.48 (s, 2H, CH<sub>2</sub>), 2.33 (s, 6H, *p*-Me), 2.12 (s, 12H, *o*-Me) ppm; <sup>1</sup>H NMR (CDCl<sub>3</sub>): δ 12.6 (br s, 2H, NH), 7.47 (d, *J* = 7.0 Hz, 2H, Ph), 7.39 (dd, *J*<sup>1</sup> = *J*<sup>2</sup> = 7.8 Hz, 2H, Ph), 7.29 (t, *J* = 7.5 Hz, 1H, Ph), 6.90 (s, 4H, Mes), 6.55 (d, *J* = 4.5 Hz, 2H, pyrrole-β), 6.53 (d, *J* = 4.5 Hz, 2H, pyrrole-β), 6.14 (d, *J* = 3.5 Hz, 2H, pyrrole-β), 5.94 (d, *J* = 4.0 Hz, 2H, pyrrole-β), 5.36 (s, 2H, CH<sub>2</sub>), 2.34 (s, 6H, *p*-Me), 2.12 (s, 12H, *o*-Me) ppm; <sup>13</sup>C NMR (acetone-*d*<sub>6</sub>): δ 160.2, 142.5, 138.8, 138.4, 137.8, 137.6, 134.1, 133.9, 133.6, 129.8, 128.7, 128.2, 127.3, 122.2, 116.8, 116.3, 116.0, 54.1, 21.2, 20.2 ppm; HR-MS (ESI-MS): *m/z* = 786.1627, calcd for (C<sub>43</sub>H<sub>40</sub>N<sub>5</sub>Br<sub>2</sub>)<sup>+</sup> = 786.1629 [(M + H)<sup>+</sup>].

***N,N*-Bis(*meso*-mesityl-1-chlorodipyrrin-9-yl)-*N*-benzylamine **2b****

A Schlenk tube containing **1b** (133 mg, 402  $\mu$ mol), Pd<sub>2</sub>(dba)<sub>3</sub>•CHCl<sub>3</sub> (10.8 mg, 10.4  $\mu$ mol), Xantphos (12.1 mg, 20.6  $\mu$ mol), and KO<sup>t</sup>Bu (113 mg, 1.00 mmol) was evacuated and then refilled with N<sub>2</sub>. To the tube, benzylamine (37.0  $\mu$ L, 340  $\mu$ mol) and dry and degassed toluene (6.00 mL) were added. The mixture was stirred at 75 °C for 11 h. The reaction mixture was passed through a short plug of silica (CHCl<sub>3</sub> as an eluent) and evaporated. Purification by silica-gel column chromatography with EtOAc/hexane afforded **2b** in 29% (40.0 mg, 57.4  $\mu$ mol) as a black solid. <sup>1</sup>H NMR (CDCl<sub>3</sub>):  $\delta$  12.7 (br s, 2H, NH), 7.43 (d, *J* = 7.0 Hz, 2H, Ph), 7.38 (dd, *J*<sup>1</sup> = *J*<sup>2</sup> = 7.8 Hz, 2H, Ph), 7.29 (t, *J* = 7.3 Hz, 1H, Ph), 6.91 (s, 4H, Mes), 6.49 (d, *J* = 5.0 Hz, 2H, pyrrole- $\beta$ ), 6.37 (d, *J* = 4.5 Hz, 2H, pyrrole- $\beta$ ), 6.07 (d, *J* = 4.0 Hz, 2H, pyrrole- $\beta$ ), 6.03 (d, *J* = 4.0 Hz, 2H, pyrrole- $\beta$ ), 5.27 (s, 2H, CH<sub>2</sub>), 2.34 (s, 6H, *p*-Me), 2.13 (s, 12H, *o*-Me) ppm; <sup>13</sup>C NMR (CDCl<sub>3</sub>):  $\delta$  158.2, 140.7, 137.5, 137.4, 135.5, 134.2, 132.9, 132.8, 131.5, 129.1, 127.9, 127.6, 126.5, 122.3, 113.5, 112.9, 53.8, 21.3, 20.1 ppm; HR-MS (ESI-MS): *m/z* = 696.2686, calcd for (C<sub>43</sub>H<sub>40</sub>N<sub>5</sub>Cl<sub>2</sub>)<sup>+</sup> = 696.2655 [(M + H)<sup>+</sup>].

***N,N*-Bis(*meso*-phenyl-1-bromodipyrrin-9-yl)-1'-bromo-1''-phenyl-*N*-benzylamine **2c****

A Schlenk tube containing **2a** (32.9 mg, 41.9  $\mu$ mol) and Pd(PPh<sub>3</sub>)<sub>4</sub> (6.33 mg, 5.48  $\mu$ mol) was evacuated and then refilled with N<sub>2</sub>. To the tube, PhSnBu<sub>3</sub> (14.0  $\mu$ L, 42.4  $\mu$ mol) and dry and degassed toluene (4.00 mL) were added. The mixture was stirred at 110 °C for 15 h. The reaction mixture was passed through a short plug of silica (CHCl<sub>3</sub> as an eluent) and evaporated. Purification by silica-gel column chromatography with CHCl<sub>3</sub>/hexane afforded **2c** in 16% (5.30 mg, 6.77  $\mu$ mol) as a black solid. <sup>1</sup>H NMR (CDCl<sub>3</sub>):  $\delta$  12.6 (br s, 1H, NH), 12.4

(br s, 1H, NH), 7.60 (d,  $J = 7.0$  Hz, 2H, Bn), 7.42 (dd,  $J^1 = J^2 = 7.8$  Hz, 2H, Bn), 7.36-7.38 (m, 2H, Ph), 7.30 (t,  $J = 7.3$  Hz, 1H, Bn), 7.09-7.15 (m, 3H, Ph), 6.94 (s, 2H, Mes), 6.93 (d,  $J = 5.0$  Hz, 1H, pyrrole- $\beta$ ), 6.91 (s, 2H, Mes), 6.84 (d,  $J = 4.5$  Hz, 1H, pyrrole- $\beta$ ), 6.70 (d,  $J = 4.5$  Hz, 1H, pyrrole- $\beta$ ), 6.58 (d,  $J = 4.5$  Hz, 1H, pyrrole- $\beta$ ), 6.49 (dd,  $J^1 = 4.0$  Hz,  $J^2 = 2.5$  Hz, 1H, pyrrole- $\beta$ ), 6.08 (d,  $J = 3.5$  Hz, 1H, pyrrole- $\beta$ ), 6.05 (dd,  $J^1 = 3.5$  Hz,  $J^2 = 1.5$  Hz, 1H, pyrrole- $\beta$ ), 5.86 (d,  $J = 4.0$  Hz, 1H, pyrrole- $\beta$ ), 5.63 (s, 2H, CH<sub>2</sub>), 2.37 (s, 3H, *p*-Me), 2.35 (s, 3H, *p*-Me), 2.17 (s, 6H, *o*-Me) 2.08 (s, 6H, *o*-Me) ppm; <sup>13</sup>C NMR (acetone-*d*<sub>6</sub>):  $\delta$  165.2, 164.3, 146.9, 146.8, 139.8, 139.4, 138.5, 138.3, 137.9, 137.8, 136.3, 135.9, 134.9, 134.4, 134.2, 133.7, 133.4, 132.2, 131.9, 129.9, 129.8, 128.8, 128.7, 128.2, 128.1, 127.5, 127.5, 125.0, 121.1, 120.2, 120.2, 118.7, 114.0, 109.8, 53.8, 21.2, 21.2, 20.2, 20.2 ppm; HR-MS (ESI-MS):  $m/z = 784.2873$ , calcd for (C<sub>49</sub>H<sub>45</sub>N<sub>5</sub>Br)<sup>+</sup> = 784.2844 [(M + H)<sup>+</sup>].

***N,N*-Bis(*meso*-mesityl-1-bromodipyrroin-9-yl)-*N*-benzylamine Zn<sup>II</sup> complex **3a****

A flask containing **2a** (119 mg, 151  $\mu$ mol), NaOAc (62.5 mg, 762  $\mu$ mol), and Zn(OAc)<sub>2</sub>•2H<sub>2</sub>O (166 mg, 756  $\mu$ mol) was charged with MeOH (60 mL). The mixture was stirred at reflux for 3 h. The reaction mixture was extracted with EtOAc. The organic layer was washed with water, dried over anhydrous Na<sub>2</sub>SO<sub>4</sub>, and concentrated in vacuo. Purification by silica-gel column chromatography with EtOAc/hexane afforded **3a** in 98% (126 mg, 148  $\mu$ mol) as a green solid. <sup>1</sup>H NMR (CDCl<sub>3</sub>):  $\delta$  7.28–7.38 (m, 5H, Bn), 6.91 (s, 4H, Mes), 6.61 (d,  $J = 4.0$  Hz, 2H, pyrrole- $\beta$ ), 6.41 (d,  $J = 4.0$  Hz, 2H, pyrrole- $\beta$ ), 6.22–6.24 (m, 4H, pyrrole- $\beta$ ), 5.29 (d,  $J = 18$  Hz, 1H, CH<sub>2</sub>), 5.15 (d,  $J = 18$  Hz, 1H, CH<sub>2</sub>), 2.35 (s, 6H, Me), 2.22 (s, 6H, Me), 2.07 (s, 6H, Me) ppm; <sup>13</sup>C NMR (CDCl<sub>3</sub>):  $\delta$  158.1, 141.0, 139.6, 138.7,

137.6, 137.4, 137.2, 136.4, 134.1, 133.7, 129.2, 129.0, 128.0, 127.8, 127.2, 126.0, 118.3, 110.9, 54.3, 21.3, 20.3, 19.8 ppm; HR-MS (ESI-MS):  $m/z$  = 850.0725, calcd for  $(C_{43}H_{38}N_5Br_2Zn)^+ = 850.0744 [(M + H)^+]$ .

***N,N*-Bis(*meso*-mesityl-1-bromodipyrroin-9-yl)-*N*-benzylamine Cu<sup>II</sup> complex **3Cu****

A flask containing **2a** (118 mg, 150  $\mu$ mol), NaOAc (62.1 mg, 757  $\mu$ mol), and Cu(OAc)<sub>2</sub>•H<sub>2</sub>O (150 mg, 751  $\mu$ mol) was charged with MeOH (50 mL). The mixture was stirred at reflux for 3 h. The reaction mixture was extracted with CHCl<sub>3</sub>. The organic layer was washed with water, dried over anhydrous Na<sub>2</sub>SO<sub>4</sub>, and concentrated in vacuo. Purification by silica-gel column chromatography with CHCl<sub>3</sub>/hexane afforded **3Cu** in 96% (122 mg, 144  $\mu$ mol) as a green solid. HR-MS (ESI-MS):  $m/z$  = 847.0769, calcd for  $(C_{43}H_{38}N_5Br_2Cu)^+ = 847.0768 [(M + H)^+]$ .

***N*-Benzyl-2-bromo-5,15-dimesityl-10-azacorrole **4** and *N*-benzyl-5,15-dimesityl-10-azacorrole **5****

A flask containing **2a** (39.1 mg, 49.8  $\mu$ mol), NaOAc (20.5 mg, 250  $\mu$ mol), and NiCl<sub>2</sub>•6H<sub>2</sub>O (59.4 mg, 250  $\mu$ mol) was charged with MeOH (20 mL). The mixture was stirred at reflux for 3 h. The reaction mixture was extracted with CHCl<sub>3</sub>. The organic layer was washed with water, dried over anhydrous Na<sub>2</sub>SO<sub>4</sub>, and concentrated in vacuo. Purification by silica-gel column chromatography with CHCl<sub>3</sub>/hexane afforded **4** in 67% (25.4 mg, 33.4  $\mu$ mol) and **5** in 32% (11.0 mg, 16.1  $\mu$ mol) as black solids. <sup>1</sup>H NMR (acetone-*d*<sub>6</sub>) of **4**:  $\delta$  8.42 (d,  $J$  = 5.0 Hz, 1H, pyrrole- $\beta$ ), 8.38 (d,  $J$  = 5.0 Hz, 1H, pyrrole- $\beta$ ), 8.35 (d,  $J$  = 4.5 Hz, 1H, pyrrole- $\beta$ ), 8.18 (d,  $J$  = 5.0 Hz, 1H, pyrrole- $\beta$ ), 8.15 (d,  $J$  = 4.5 Hz, 1H, pyrrole- $\beta$ ), 7.81 (d,  $J$  = 4.5 Hz, 1H,

pyrrole- $\beta$ ), 7.73 (s, 1H, pyrrole- $\beta$ ), 7.25–7.31 (m, 7H), 7.21 (s, 4H, Mes), 2.51 (s, 6H, *p*-Me), 1.91 (s, 12H, *o*-Me) ppm;  $^{13}\text{C}$  NMR ( $\text{CDCl}_3$ ):  $\delta$  144.5, 144.0, 142.3, 138.5, 137.9, 137.7, 137.7, 135.0, 134.7, 133.5, 133.4, 133.3, 133.1, 132.9, 132.6, 129.3, 129.0, 128.3, 127.9, 127.9, 127.9, 127.8, 125.5, 125.2, 124.9, 117.8, 112.6, 111.9, 104.4, 57.2, 21.5, 21.1 ppm; HR-MS (ESI-MS):  $m/z$  = 762.1541, calcd for  $(\text{C}_{43}\text{H}_{37}\text{N}_5\text{BrNi})^+ = 762.1560$  [(M + H) $^+$ ].

### ***N*-Benzyl-5,15-dimesityl-2-phenyl-10-azacorrole 6**

A flask containing **2c** (5.30 mg, 6.77  $\mu\text{mol}$ ), NaOAc (3.05 mg, 37.2  $\mu\text{mol}$ ), and  $\text{NiCl}_2 \cdot 6\text{H}_2\text{O}$  (8.86 mg, 37.3  $\mu\text{mol}$ ) was charged with MeOH (3 mL). The mixture was stirred at reflux for 4 h. The reaction mixture was extracted with  $\text{CHCl}_3$ . The organic layer was washed with water, dried over anhydrous  $\text{Na}_2\text{SO}_4$ , and concentrated in vacuo. Purification by silica-gel column chromatography with  $\text{CHCl}_3$ /hexane afforded **6** in 99% (5.08 mg, 6.70  $\mu\text{mol}$ ) as a black solid.  $^1\text{H}$  NMR ( $\text{CDCl}_3$ ):  $\delta$  8.30 (d,  $J$  = 4.5 Hz, 1H, pyrrole- $\beta$ ), 8.24 (dd,  $J^1$  = 8.5 Hz,  $J^2$  = 1.5 Hz, 2H), 8.14 (d,  $J$  = 4.5 Hz, 1H, pyrrole- $\beta$ ), 8.13 (d,  $J$  = 5.0 Hz, 1H, pyrrole- $\beta$ ), 7.97 (d,  $J$  = 5.0 Hz, 1H, pyrrole- $\beta$ ), 7.96 (d,  $J$  = 4.5 Hz, 1H, pyrrole- $\beta$ ), 7.91 (s, 1H, pyrrole- $\beta$ ), 7.84 (d,  $J$  = 4.0 Hz, 1H, pyrrole- $\beta$ ), 7.59–7.62 (m, 2H), 7.41–7.44 (m, 1H), 7.28–7.30 (m, 3H), 7.17–7.19 (m, 2H), 7.15 (s, 2H, Mes), 7.14 (s, 2H, Mes), 6.98 (s, 2H,  $\text{CH}_2$ ), 2.53 (s, 3H, *p*-Me), 2.53 (s, 3H, *p*-Me), 1.96 (s, 6H, *o*-Me) 1.93 (s, 6H, *o*-Me) ppm;  $^{13}\text{C}$  NMR ( $\text{CDCl}_3$ ):  $\delta$  144.7, 143.9, 143.8, 142.5, 138.7, 138.6, 137.9, 137.7, 137.6, 137.1, 135.3, 135.0, 133.4, 133.3, 133.1, 132.6, 129.6, 129.2, 128.9, 128.3, 128.1, 127.8, 127.8, 127.7, 126.9, 125.5, 125.0, 122.5, 118.7, 111.9, 111.8, 57.2, 21.5, 21.1, 21.1 ppm; HR-MS (ESI-MS):  $m/z$  = 758.2792, calcd for  $(\text{C}_{49}\text{H}_{42}\text{N}_5\text{Ni})^+ = 758.2788$  [(M + H) $^+$ ].

### **Al<sup>III</sup> 10-azacorrole 7**

A two-necked flask containing **2a** (137 mg, 174  $\mu$ mol) and AlCl<sub>3</sub> (239 mg, 1.80 mmol) was evacuated and then refilled with N<sub>2</sub>. To the flask, dry pyridine (50 mL) was added. The mixture was stirred at reflux for 4 h. The reaction mixture was extracted with CHCl<sub>3</sub>. The organic layer was washed with water, dried over anhydrous Na<sub>2</sub>SO<sub>4</sub>, and concentrated in vacuo. A Schlenk tube containing the residue, Pd<sub>2</sub>(dba)<sub>3</sub>•CHCl<sub>3</sub> (50.4 mg, 48.8  $\mu$ mol), and Xphos (101 mg, 212  $\mu$ mol) was evacuated and then refilled with N<sub>2</sub>. To the tube, dry and degassed toluene (10.5 mL), Et<sub>3</sub>N (1.5 mL), and HCOOH (500  $\mu$ L, 13.2 mmol) were added. The mixture was stirred at 65 °C for 4 h. The reaction mixture was extracted with CHCl<sub>3</sub>. The organic layer was washed with water, dried over anhydrous Na<sub>2</sub>SO<sub>4</sub>, and concentrated in vacuo. Purification by silica-gel column chromatography with CHCl<sub>3</sub>/MeOH followed by recrystallization with MeOH/H<sub>2</sub>O afforded the title compound **7** in 67% (78.3 mg, 117  $\mu$ mol) as a purple solid. <sup>1</sup>H NMR (CD<sub>3</sub>OD):  $\delta$  8.57 (d, *J* = 4.0 Hz, 2H, pyrrole- $\beta$ ), 8.42 (d, *J* = 5.0 Hz, 2H, pyrrole- $\beta$ ), 8.32 (d, 2H, *J* = 4.5 Hz pyrrole- $\beta$ ), 8.15 (d, *J* = 4.0 Hz, 2H, pyrrole- $\beta$ ), 7.22–7.28 (m, 11H), 2.54 (s, 6H, Mes-*p*-Me), 1.91 (s, 12H, Mes-*o*-Me) ppm; <sup>13</sup>C NMR (CD<sub>3</sub>OD):  $\delta$  149.9, 144.0, 139.7, 139.6, 139.4, 139.1, 138.2, 136.2, 133.1, 131.2, 130.0, 129.6, 129.0, 128.9, 126.6, 118.4, 113.7, 58.1, 21.5, 21.1 ppm; HR-MS (ESI-MS): *m/z* = 690.2753, calcd for (C<sub>43</sub>H<sub>38</sub>N<sub>5</sub>OAlNa)<sup>+</sup> = 690.2784 [(M + Na)<sup>+</sup>].

### **2-Boryl-5,15-dimesityl-10-azacorrole 8**

A Schlenk tube containing bromoazacorrole **4** (38.0 mg, 49.9  $\mu$ mol), Pd<sub>2</sub>(dba)<sub>3</sub>•CHCl<sub>3</sub> (2.61 mg, 2.52  $\mu$ mol), Xphos (4.86 mg, 10.2  $\mu$ mol), B<sub>2</sub>pin<sub>2</sub> (39.2 mg, 154  $\mu$ mol), and KOAc (14.7



mg, 150  $\mu$ mol) was evacuated and then refilled with N<sub>2</sub>. To the tube, dry 1,4-dioxane (2.00 mL) was added. The mixture was stirred at 110 °C for 2 h. The reaction mixture was filtered over a pad of Celite (CH<sub>2</sub>Cl<sub>2</sub> as an eluent) and evaporated in vacuo. Purification by silica-gel column chromatography with CH<sub>2</sub>Cl<sub>2</sub>/hexane afforded **8** in 52% (20.8 mg, 25.7  $\mu$ mol) as a black solid. <sup>1</sup>H NMR (acetone-*d*<sub>6</sub>):  $\delta$  8.65 (d, *J* = 4.5 Hz, 1H, pyrrole- $\beta$ ), 8.34 (d, *J* = 5.0 Hz, 1H, pyrrole- $\beta$ ), 8.29 (d, *J* = 4.5 Hz, 1H, pyrrole- $\beta$ ), 8.16 (d, *J* = 5.0 Hz, 1H, pyrrole- $\beta$ ), 8.11 (s, 1H, pyrrole- $\beta$ ), 8.09 (d, *J* = 4.5 Hz, 1H, pyrrole- $\beta$ ), 7.76 (d, *J* = 4.5 Hz, 1H, pyrrole- $\beta$ ), 7.27–7.30 (m, 5H), 7.21 (s, 2H), 7.20 (s, 2H), 7.19 (s, 2H), 2.52 (s, 3H, *p*-Me), 2.51 (s, 3H, *p*-Me), 1.92 (s, 6H, *o*-Me), 1.92 (s, 6H, *o*-Me), 1.52 (s, 12H, Bpin) ppm; <sup>13</sup>C NMR (acetone-*d*<sub>6</sub>):  $\delta$  149.9, 146.8, 145.8, 145.2, 139.6, 138.8, 138.6, 138.4, 136.0, 135.9, 134.5, 133.9, 133.8, 133.7, 133.4, 133.1, 129.8, 129.1, 128.7, 128.6, 128.6, 126.7, 126.4, 125.7, 125.0, 120.6, 118.8, 114.8, 113.7, 84.4, 57.6, 31.8, 25.5, 21.4, 21.1, 21.0 ppm; HR-MS (ESI-MS): *m/z* = 808.3345, calcd for (C<sub>49</sub>H<sub>49</sub>N<sub>5</sub>BO<sub>2</sub>Ni)<sup>+</sup> = 808.3336 [(M + H)<sup>+</sup>].

### **2,2'-Bridged 10-azacorrole dimer 9**

A Schlenk tube containing bromoazacorrole **4** (22.3 mg, 29.2  $\mu$ mol), 2,2'-bipyridyl (21.6 mg, 128  $\mu$ mol), and Ni(cod)<sub>2</sub> (41.6 mg, 151  $\mu$ mol) was evacuated and then refilled with N<sub>2</sub>. To the tube, 1,5-dicyclooctadiene (15  $\mu$ L, 143  $\mu$ mol) and dry DMF (2.00 mL) was added. The mixture was stirred at 60 °C for 4 h. The reaction mixture was extracted with EtOAc. The organic layer was washed with water, dried over anhydrous Na<sub>2</sub>SO<sub>4</sub>, and concentrated in vacuo. Purification by silica-gel column chromatography with CHCl<sub>3</sub>/hexane followed by recrystallization with CHCl<sub>3</sub>/MeOH afforded **9** in 62% (12.4 mg, 9.10  $\mu$ mol) as a green solid.

<sup>1</sup>H NMR (CDCl<sub>3</sub>): δ 8.62 (s, 2H, pyrrole-β), 8.22 (d, *J* = 4.5 Hz, 2H, pyrrole-β), 8.19 (d, *J* = 5.0 Hz, 2H, pyrrole-β), 8.14 (d, *J* = 4.5 Hz, 2H, pyrrole-β), 8.00 (d, *J* = 5.0 Hz, 2H, pyrrole-β), 7.98 (d, *J* = 4.5 Hz, 2H, pyrrole-β), 7.78 (d, *J* = 4.0 Hz, 2H, pyrrole-β), 7.29–7.32 (m, 6H, Bn), 7.23–7.25 (m, 4H, Bn), 7.18 (s, 4H, Mes), 7.13 (s, 4H, Mes-*m*), 7.01 (s, 4H, Bn), 2.52 (s, 12H, *p*-Me), 2.10 (s, 12H, *o*-Me), 1.93 (s, 12H, *o*-Me) ppm; <sup>13</sup>C NMR (CDCl<sub>3</sub>): δ 143.8, 138.7, 138.6, 138.0, 137.7, 135.5, 135.4, 133.8, 133.5, 133.0, 132.4, 129.5, 129.2, 128.2, 127.9, 127.8, 127.7, 125.6, 124.9, 124.5, 118.8, 111.6, 57.2, 21.5, 21.5, 21.2, 21.1 ppm; HR-MS (ESI-MS): *m/z* = 1363.4749, calcd for (C<sub>86</sub>H<sub>73</sub>N<sub>10</sub>Ni<sub>2</sub>)<sup>+</sup> = 1363.4717 [(M + H)<sup>+</sup>].

### Isolation of nitrogen-bridged dipyrin dimer Ni<sup>II</sup> complex **3Ni**

The nitrogen-bridged dipyrin dimer Ni<sup>II</sup> complex **3Ni** was isolated by using 3,5-bis(trifluoromethyl)phenyl substituents at the *meso*-positions. This Ni<sup>II</sup> complex was converted into the corresponding azacorrole only by heating. The synthetic details and compound data were described below.

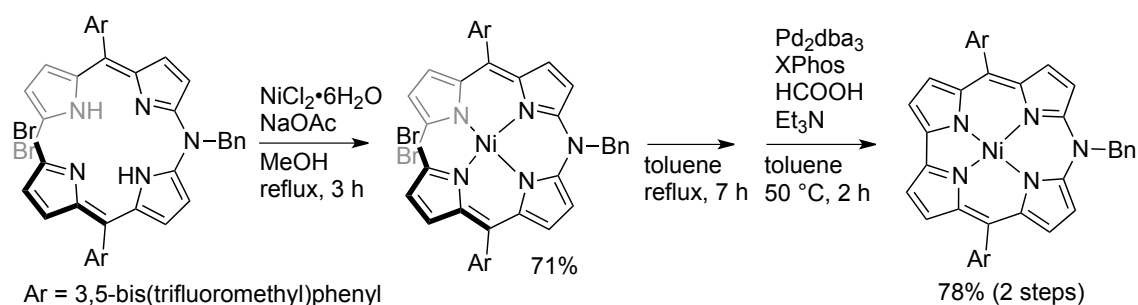

**Scheme S1.** Synthesis of *meso*-3,5-bis(trifluoromethyl)phenylazacorrole through isolation of Ni<sup>II</sup> dipyrin complex intermediate **3Ni**.

***meso*-3,5-Bis(trifluoromethyl)phenyl- $\alpha,\alpha'$ -dibromodipyrin**

A two-necked flask containing *meso*-3,5-bis(trifluoromethyl)phenyldipyrromethane (537 mg, 1.50 mmol) was evacuated and then refilled with N<sub>2</sub>. To the flask, dry THF (22.5 mL) was added and cool to -78 °C. NBS (530 mg, 2.98 mmol) was added to the solution in three portions every 15 min. After addition of all NBS, the solution was stirred for 1 h. Then DDQ (340 mg, 1.50 mmol) was added and stirred at -78 °C for 10 min and at room temperature for 20 min. The reaction mixture was subjected to alumina column chromatography (EtOAc as an eluent) and evaporated. Purification by silica-gel column chromatography with CH<sub>2</sub>Cl<sub>2</sub>/hexane afforded the title compound in 71% (545 mg, 1.06 mmol) as an orange solid. <sup>1</sup>H NMR (CDCl<sub>3</sub>):  $\delta$  12.4 (br s, 1H, NH), 8.02 (s, 1H, Ar-*p*), 7.90 (s, 2H, Ar-*o*), 6.40 (d, *J* = 4.5 Hz, 2H, pyrrole- $\beta$ ), 6.32 (d, *J* = 4.0 Hz, 2H, pyrrole- $\beta$ ) ppm; <sup>13</sup>C NMR (CDCl<sub>3</sub>):  $\delta$  140.0, 137.8, 134.9, 131.8 (q, CF<sub>3</sub>), 131.4, 130.6, 129.5, 126.4, 124.2, 123.3, 123.3, 123.3, 122.0, 121.8 ppm; <sup>19</sup>F NMR (CDCl<sub>3</sub>):  $\delta$  -66.0 ppm; HR-MS (ESI-MS): *m/z* = 514.9024, calcd for (C<sub>17</sub>H<sub>9</sub>N<sub>2</sub>Br<sub>2</sub>F<sub>6</sub>)<sup>+</sup> = 514.9011 [(M + H)<sup>+</sup>].

***N,N*-Bis(*meso*-3,5-bis(trifluoromethyl)phenyl-1-bromodipyrin-9-yl)-*N*-benzylamine**

A Schlenk tube containing *meso*-3,5-bis(trifluoromethyl)phenyl- $\alpha,\alpha$ -dibromodipyrin (307 mg, 597  $\mu$ mol), Pd<sub>2</sub>(dba)<sub>3</sub>•CHCl<sub>3</sub> (15.8 mg, 15.3  $\mu$ mol), Xantphos (21.4 mg, 36.4  $\mu$ mol), and <sup>t</sup>BuOK (167 mg, 1.49 mmol) was evacuated and then refilled with N<sub>2</sub>. To the tube, benzylamine (60.0  $\mu$ L, 552  $\mu$ mol) and dry and degassed toluene (9.00 mL) were added. The mixture was stirred at 75 °C for 11 h. The reaction mixture was passed through a short plug of silica (CHCl<sub>3</sub> as an eluent) and evaporated. Purification by silica-gel column chromatography

with CHCl<sub>3</sub>/hexane afforded the title compound in 37% (107 mg, 110 μmol) as a brown solid.

<sup>1</sup>H NMR (acetone-*d*<sub>6</sub>): δ 12.7 (br s, 2H, NH), 8.21 (s, 2H, Ar-*p*), 8.12 (s, 4H, Ar-*o*), 7.56 (d, *J* = 7.5 Hz, 2H, Ph), 7.44 (dd, *J*<sup>1</sup> = *J*<sup>2</sup> = 7.8 Hz, 2H, Ph), 7.32 (t, *J* = 7.5 Hz, 1H, Ph), 7.10 (d, *J* = 5.0 Hz, 2H, pyrrole-β), 6.87 (d, *J* = 5.0 Hz, 2H, pyrrole-β), 6.28 (d, *J* = 4.0 Hz, 2H, pyrrole-β), 6.14 (d, *J* = 4.0 Hz, 2H, pyrrole-β), 5.63 (s, 2H, CH<sub>2</sub>) ppm; <sup>13</sup>C NMR (CDCl<sub>3</sub>): δ 163.9, 145.5, 138.8, 137.2, 135.9, 134.0, 131.6 (q, CF<sub>3</sub>), 130.9, 130.0, 129.3, 127.8, 126.6, 126.5, 124.4, 122.7, 122.2, 120.3, 120.0, 114.4, 110.9, 53.6 ppm; <sup>19</sup>F NMR (CDCl<sub>3</sub>): δ -66.0 ppm; HR-MS (ESI-MS): *m/z* = 974.0209, calcd for (C<sub>41</sub>H<sub>24</sub>N<sub>5</sub>Br<sub>2</sub>F<sub>12</sub>)<sup>+</sup> = 974.0185 [(M + H)<sup>+</sup>].

***N,N*-Bis(*meso*-3,5-bis(trifluoromethyl)phenyl-1-bromodipyrin-9-yl)-*N*-benzylamine Ni complex**

A flask containing *N,N*-bis(*meso*-3,5-bis(trifluoromethyl)phenyl-1-bromodipyrin-9-yl)-*N*-benzylamine (11.6 mg, 11.9 μmol), AcONa (4.43 mg, 54.0 μmol), and NiCl<sub>2</sub>•6H<sub>2</sub>O (13.7 mg, 57.7 μmol) was charged with MeOH (4 mL). The mixture was stirred at reflux for 3 h. After the precipitated solid was washed with MeOH, the title compound was obtained in 71% (8.72 mg, 8.46 μmol) as a black solid. <sup>1</sup>H NMR (acetone-*d*<sub>6</sub>): δ 8.26 (br s, 2H, Ar), 8.21 (s, 2H, Ar), 7.90 (br s, 2H, Ar), 7.38 (t, *J* = 7.3 Hz, 2H, Bn), 7.26–7.31 (m, 3H, Bn), 6.94 (d, *J* = 5.0 Hz, 2H, pyrrole-β), 6.62 (d, *J* = 5.0 Hz, 2H, pyrrole-β), 6.40 (d, *J* = 4.0 Hz, 2H, pyrrole-β), 6.08 (d, *J* = 4.0 Hz, 2H, pyrrole-β), 5.52 (d, *J* = 18 Hz, 1H, CH<sub>2</sub>), 5.28 (d, *J* = 18 Hz, 1H, CH<sub>2</sub>) ppm; <sup>13</sup>C NMR (acetone-*d*<sub>6</sub>): δ 156.1, 139.8, 139.1, 137.2, 136.1, 135.5, 133.9, 133.9, 132.0, 131.8, 129.9, 128.7, 127.0, 125.6, 125.4, 123.6, 112.5, 54.3 ppm; <sup>19</sup>F NMR (CDCl<sub>3</sub>): δ -65.8, -65.9 ppm; HR-MS (ESI-MS): *m/z* = 1029.9383, calcd for (C<sub>41</sub>H<sub>22</sub>N<sub>5</sub>Br<sub>2</sub>F<sub>12</sub>Ni)<sup>+</sup> =

1029.9377 [(M + H)<sup>+</sup>].

**5,15-(3,5-Bis(trifluoromethyl)phenyl)-10-azacorrole.**

A flask containing *meso*-3,5-bis(trifluoromethyl)phenyl Ni<sup>II</sup> complex (10.1 mg, 9.80 μmol), was charged with toluene (7.00 mL). The mixture was stirred at reflux for 7 h. The reaction mixture was extracted with CHCl<sub>3</sub>. The organic layer was washed with water, dried over anhydrous Na<sub>2</sub>SO<sub>4</sub>, and concentrated in vacuo. The reaction mixture was passed through a short plug of silica (CHCl<sub>3</sub> as an eluent) and evaporated. A Schlenk tube containing the residue, Pd<sub>2</sub>(dba)<sub>3</sub>•CHCl<sub>3</sub> (2.42 mg, 2.34 μmol), and Xphos (5.56 mg, 11.7 μmol) was evacuated and then refilled with N<sub>2</sub>. To the tube, dry and degassed toluene (3.50 mL), Et<sub>3</sub>N (500 μL), and HCOOH (20 μL, 529 μmol) were added. The mixture was stirred at 50 °C for 2 h. The reaction mixture was evaporated. Purification by silica-gel column chromatography with CHCl<sub>3</sub>/hexane afforded the title compound in 78% (6.69 mg, 7.69 μmol) as a black solid. <sup>1</sup>H NMR (acetone-*d*<sub>6</sub>): δ 8.66 (s, 4H, Ar-*o*), 8.60 (d, *J* = 5.0 Hz, 2H, pyrrole-β), 8.60 (d, *J* = 4.5 Hz, 2H, pyrrole-β), 8.50 (d, 2H, *J* = 5.0 Hz pyrrole-β), 8.43 (s, 2H, Ar-*p*), 8.12 (d, *J* = 4.5 Hz, 2H, pyrrole-β), 7.33 (s, 2H, Bn) 7.26–7.27 (m, 3H, Bn), 7.15–7.17 (m, 2H, Bn) ppm; <sup>13</sup>C NMR (acetone-*d*<sub>6</sub>): δ 145.7, 145.0, 142.4, 139.5, 134.0, 134.0, 133.6, 131.5, 131.3, 129.7, 128.8, 126.7, 126.3, 125.8, 125.3, 122.8, 119.2, 115.4, 58.1 ppm; <sup>19</sup>F NMR (CDCl<sub>3</sub>): δ –65.7 ppm; HR-MS (ESI-MS): *m/z* = 870.1034, calcd for (C<sub>41</sub>H<sub>22</sub>N<sub>5</sub>F<sub>12</sub>Ni)<sup>+</sup> = 870.1032 [(M + H)<sup>+</sup>].

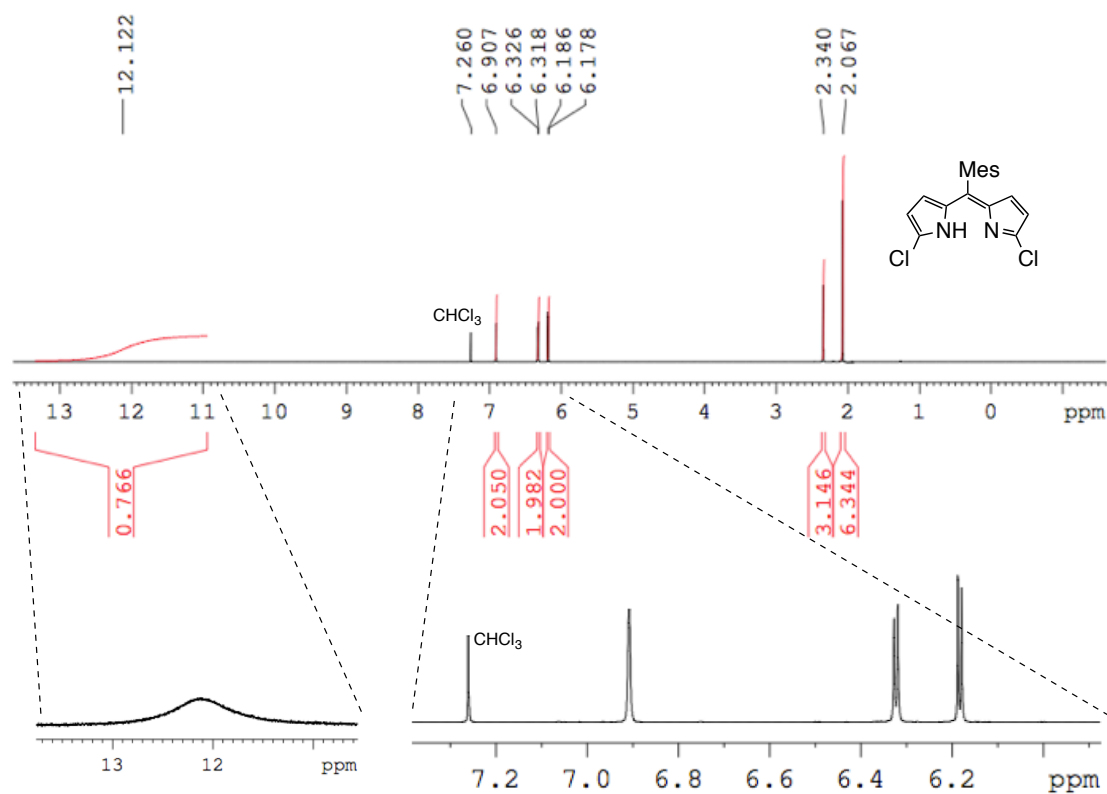

**Fig S1.**  $^1H$  NMR spectrum of **1b** in  $CDCl_3$ .

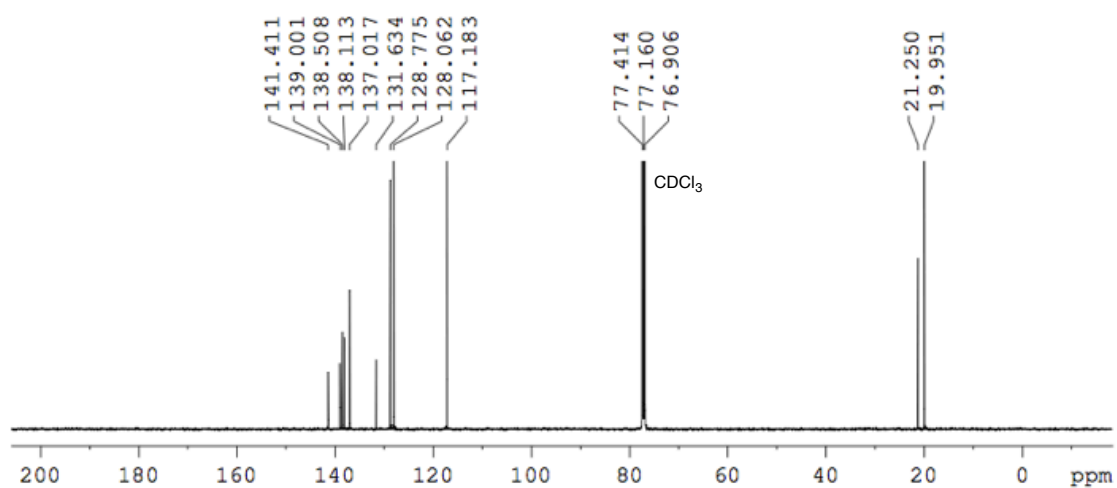

**Fig S2.**  $^{13}C$  NMR spectrum of **1b** in  $CDCl_3$ .

\* = solvents and impurities

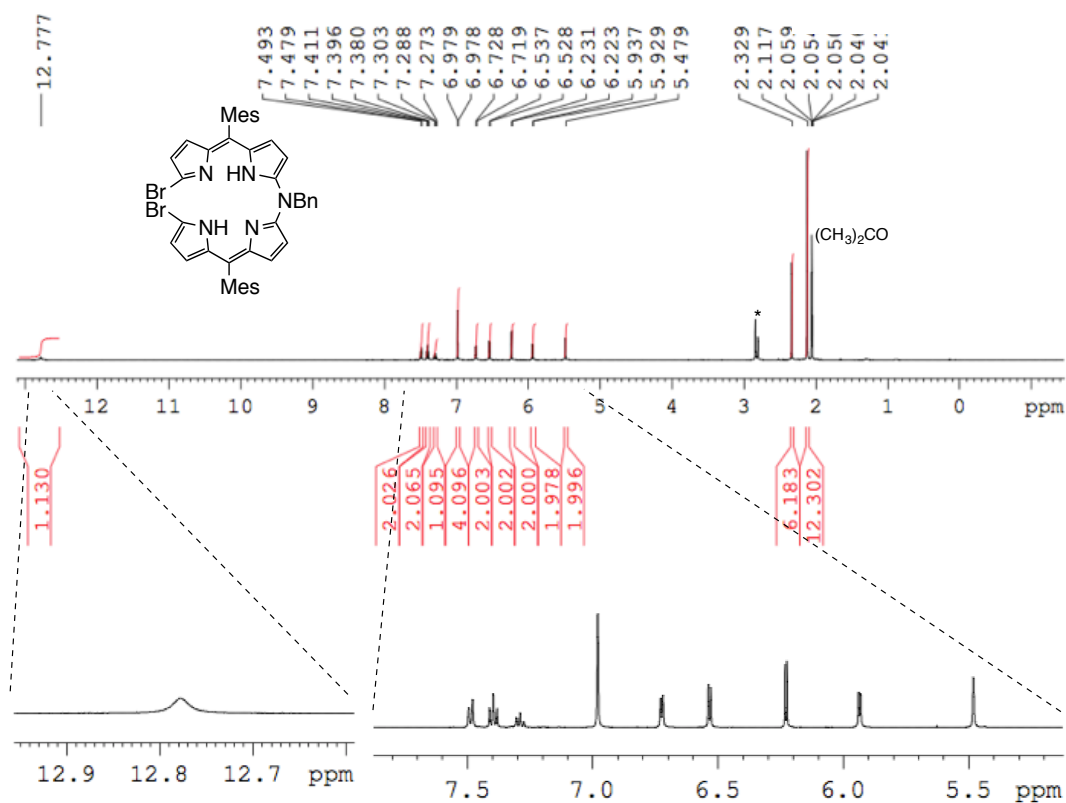

Fig S3.  $^1H$  NMR spectrum of **2a** in  $acetone-d_6$ .

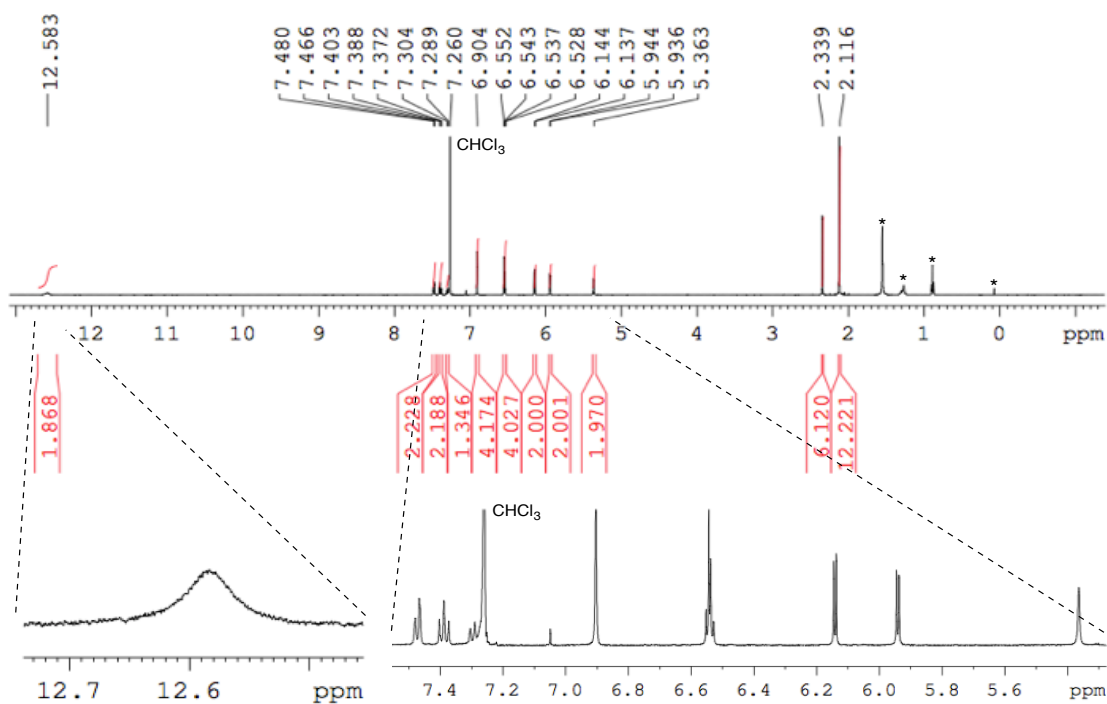

Fig S4.  $^1H$  NMR spectrum of **2a** in  $CDCl_3$ .

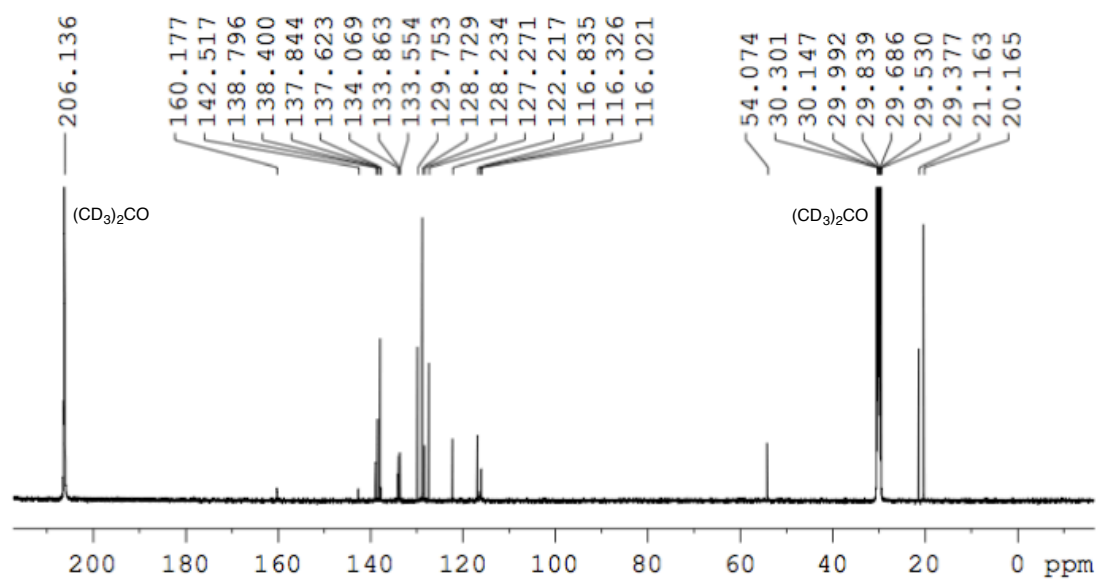

**Fig S5.**  $^{13}C$  NMR spectrum of **2a** in acetone- $d_6$ .



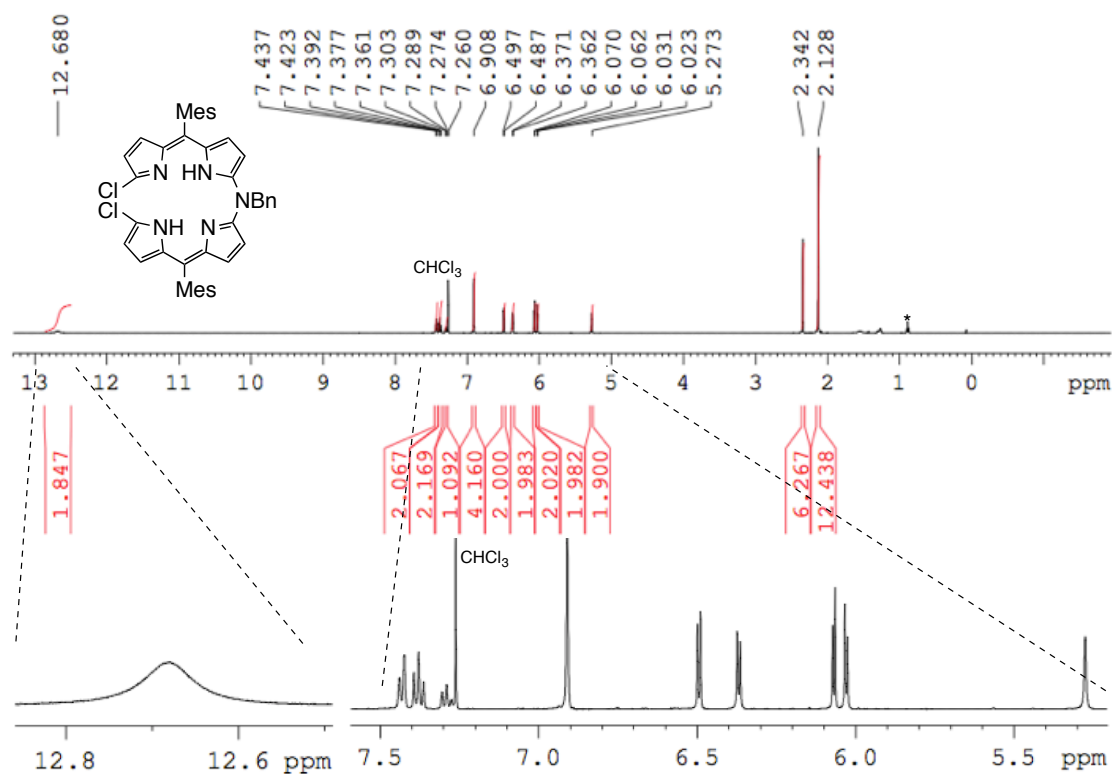

**Fig S6.**  $^1H$  NMR spectrum of **2b** in  $CDCl_3$ .

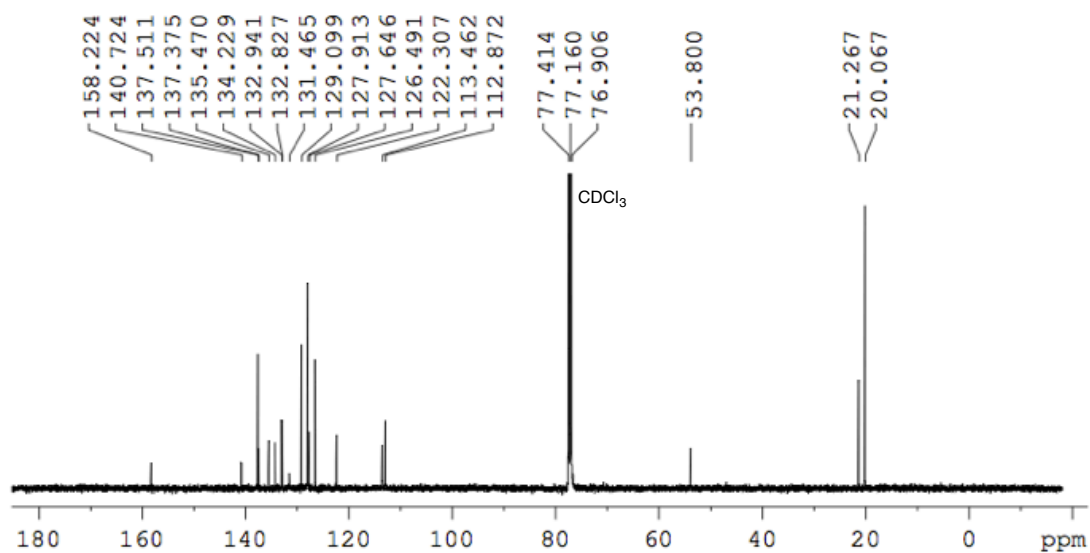

**Fig S7.**  $^{13}C$  NMR spectrum of **2b** in  $CDCl_3$ .

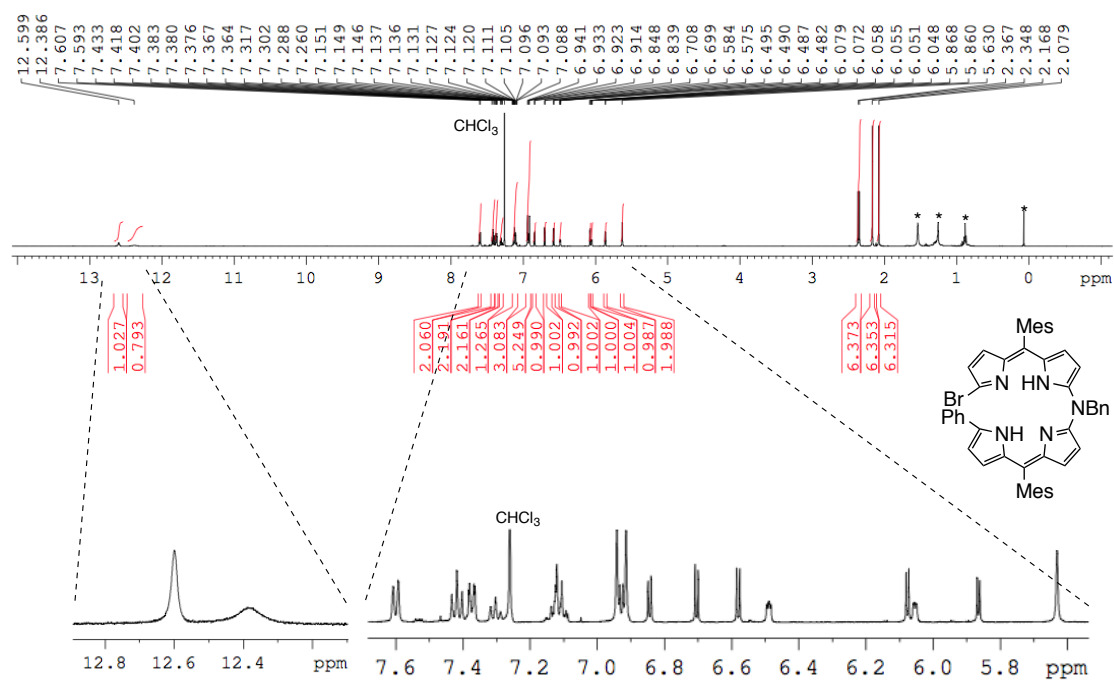

Fig S8.  $^1H$  NMR spectrum of **2c** in  $CDCl_3$ .

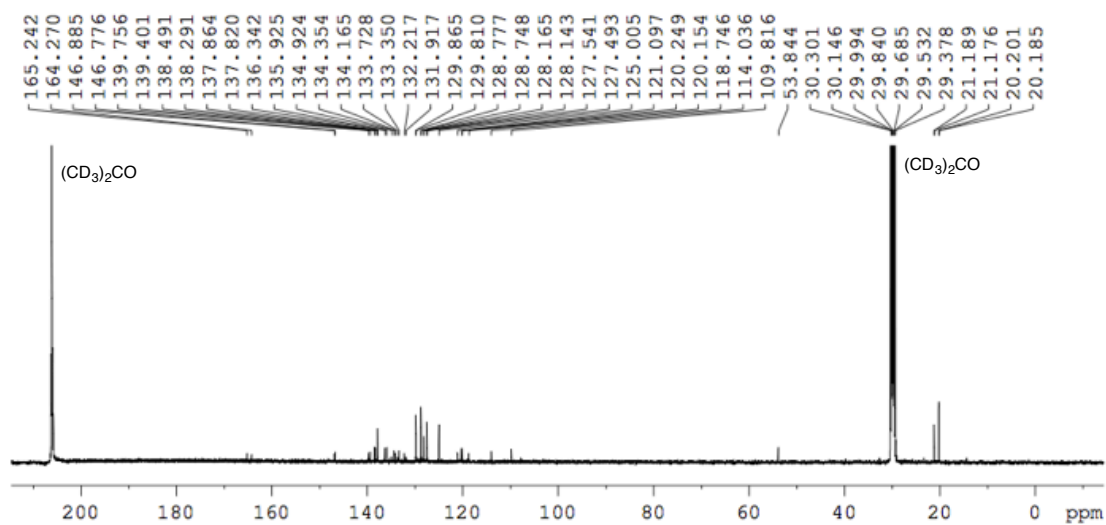

Fig S9.  $^{13}C$  NMR spectrum of **2c** in acetone- $d_6$ .

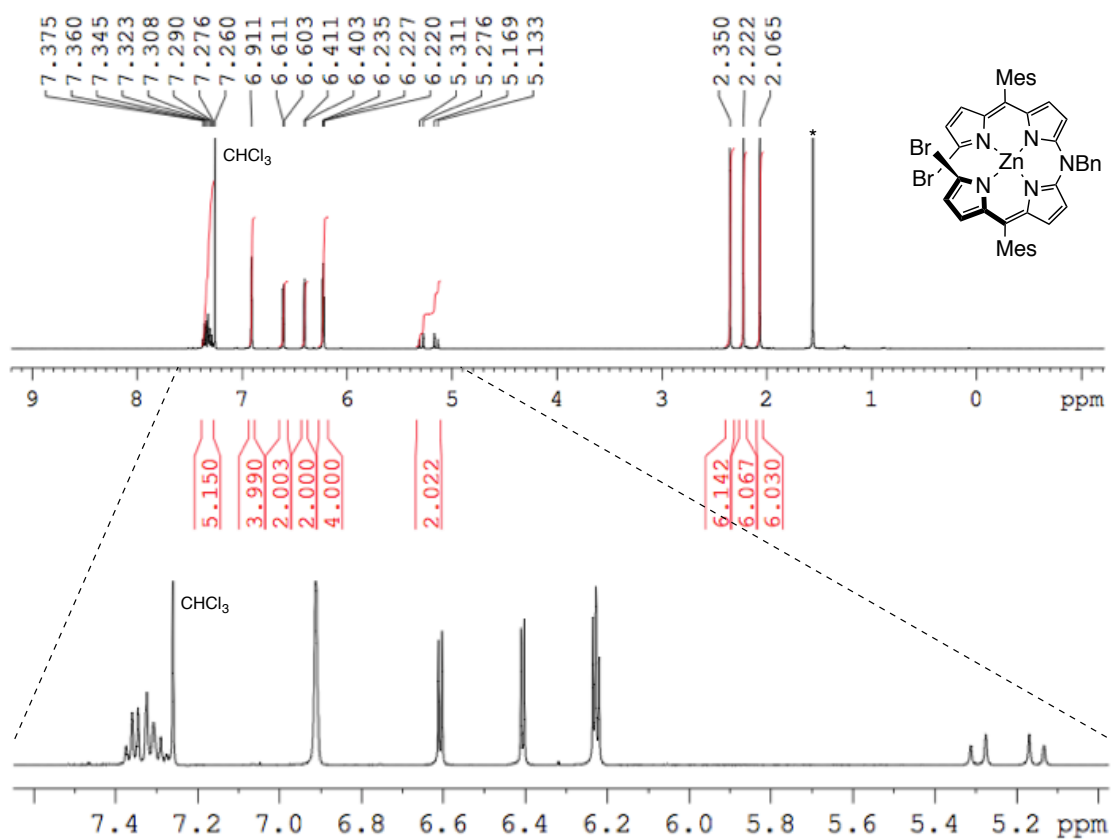

**Fig S10.** <sup>1</sup>H NMR spectrum of **3Zn** in CDCl<sub>3</sub>.

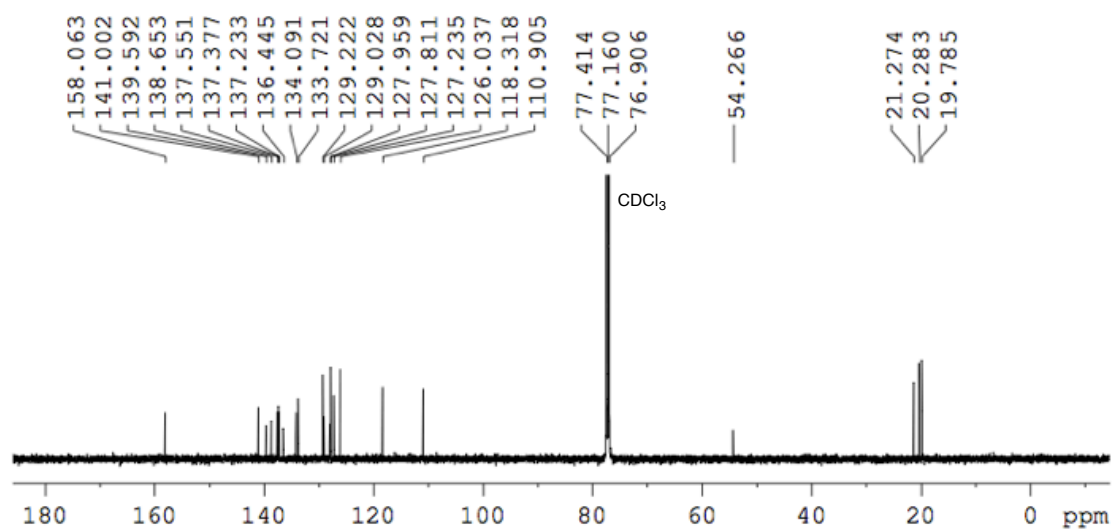

**Fig S11.** <sup>13</sup>C NMR spectrum of **3Zn** in CDCl<sub>3</sub>.

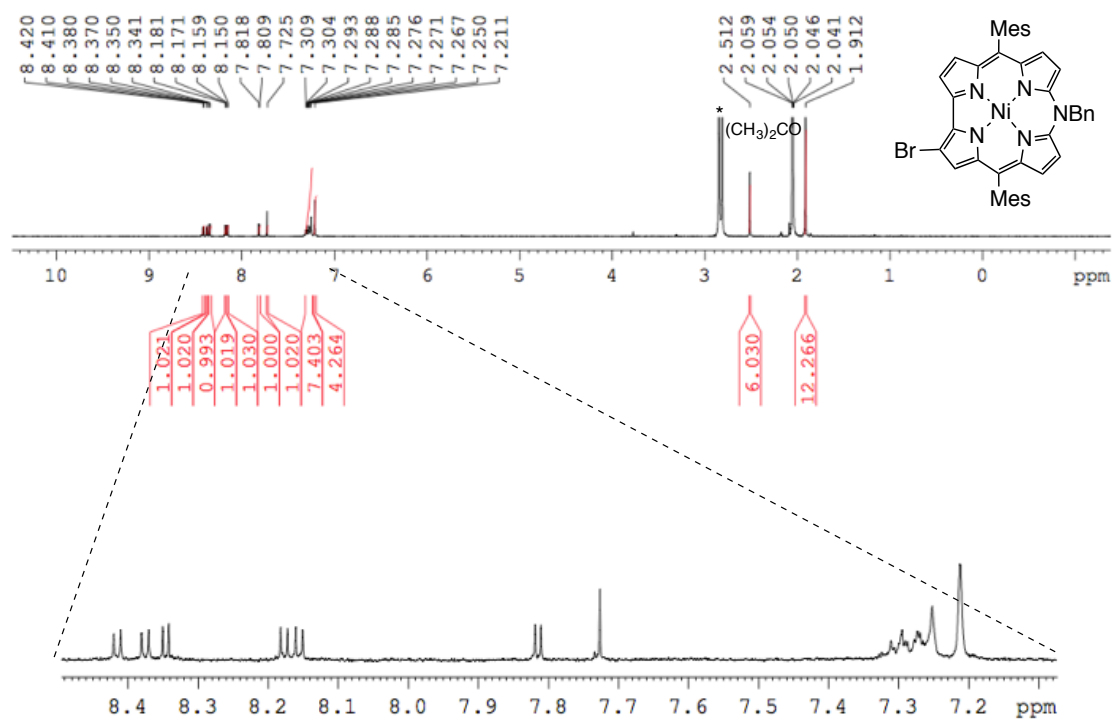

**Fig S12.** <sup>1</sup>H NMR spectrum of **4** in acetone-*d*<sub>6</sub>.

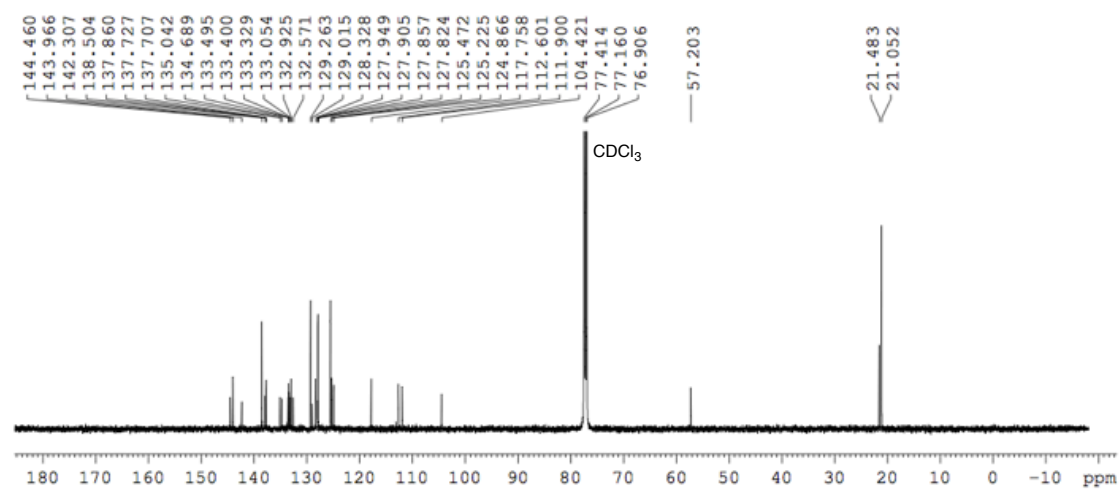

**Fig S13.** <sup>13</sup>C NMR spectrum of **4** in CDCl<sub>3</sub>.

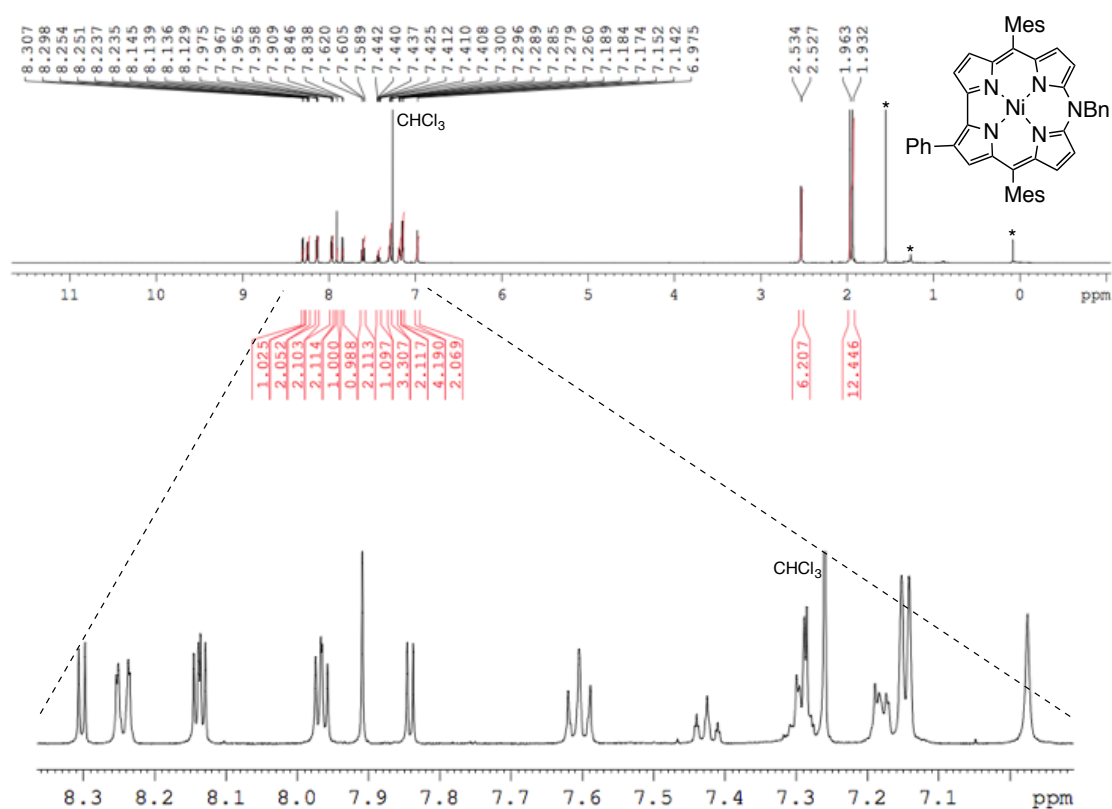

**Fig S14.**  $^1H$  NMR spectrum of **6** in  $CDCl_3$ .

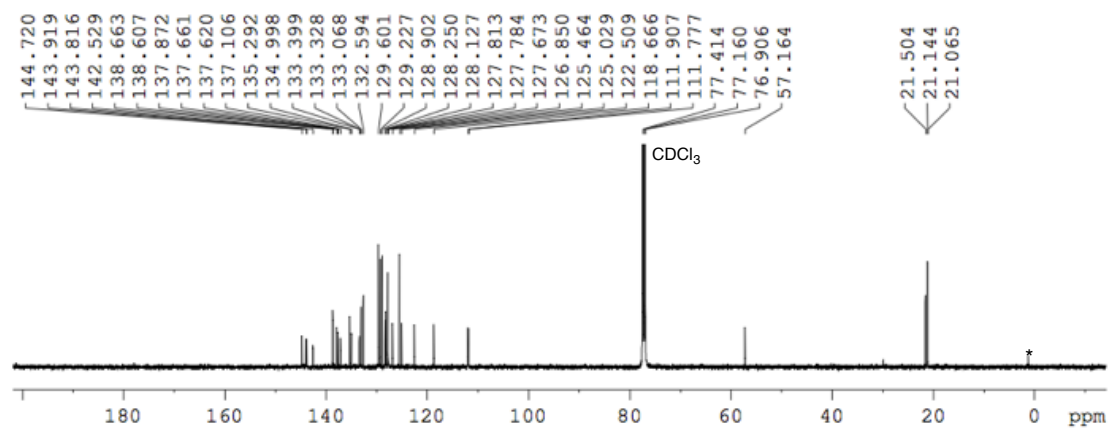

**Fig S15.**  $^{13}C$  NMR spectrum of **6** in  $CDCl_3$ .

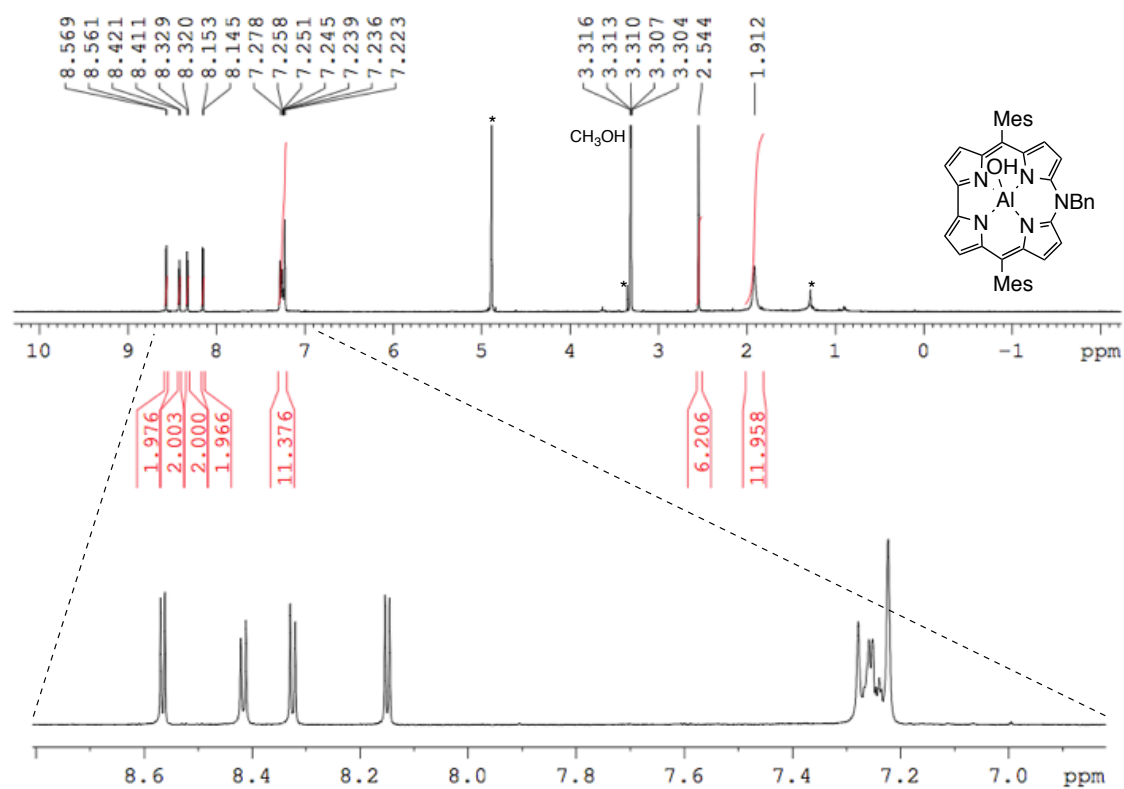

**Fig S16.**  $^1\text{H}$  NMR spectrum of **7** in  $\text{CD}_3\text{OD}$ .

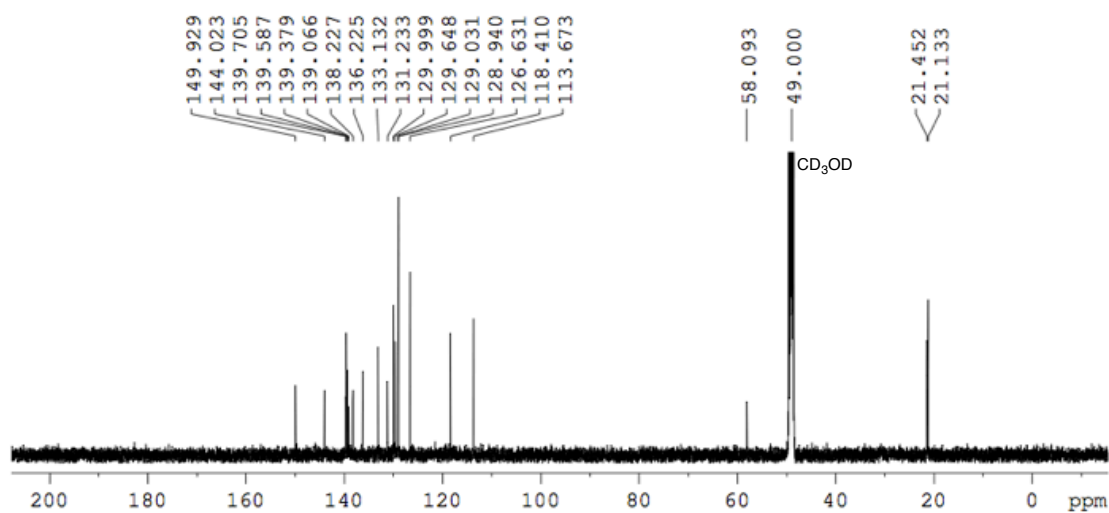

**Fig S17.**  $^{13}\text{C}$  NMR spectrum of **7** in  $\text{CD}_3\text{OD}$ .

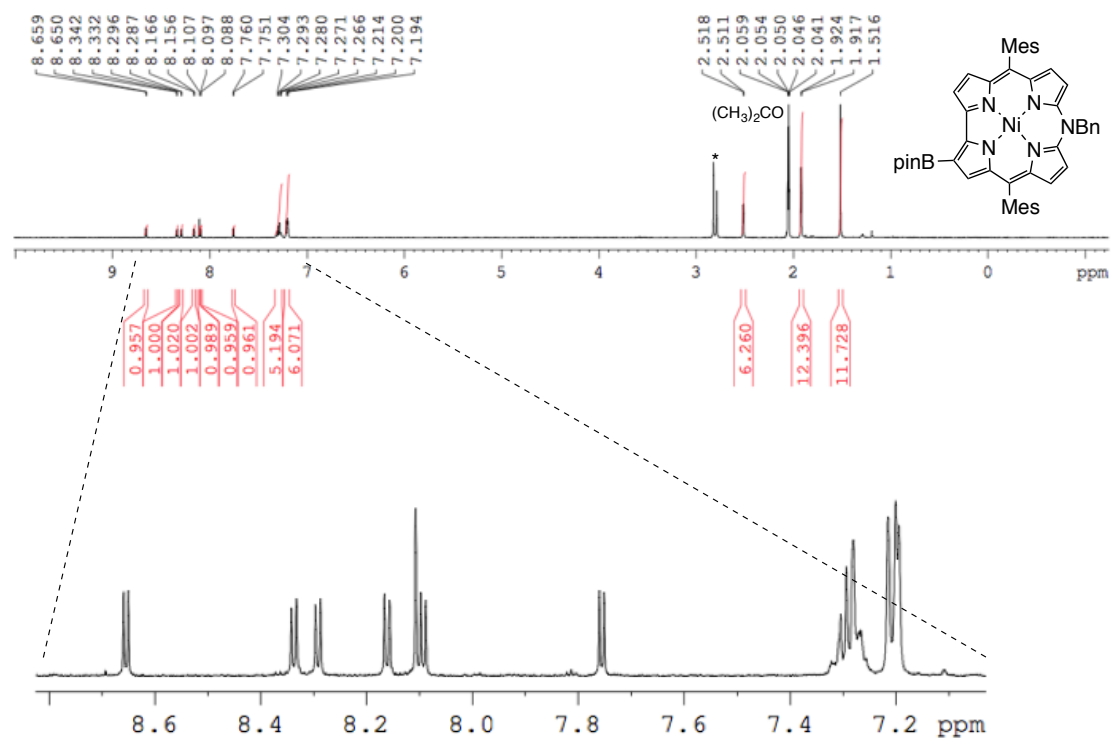

**Fig S18.**  $^1\text{H}$  NMR spectrum of **8** in acetone- $d_6$ .

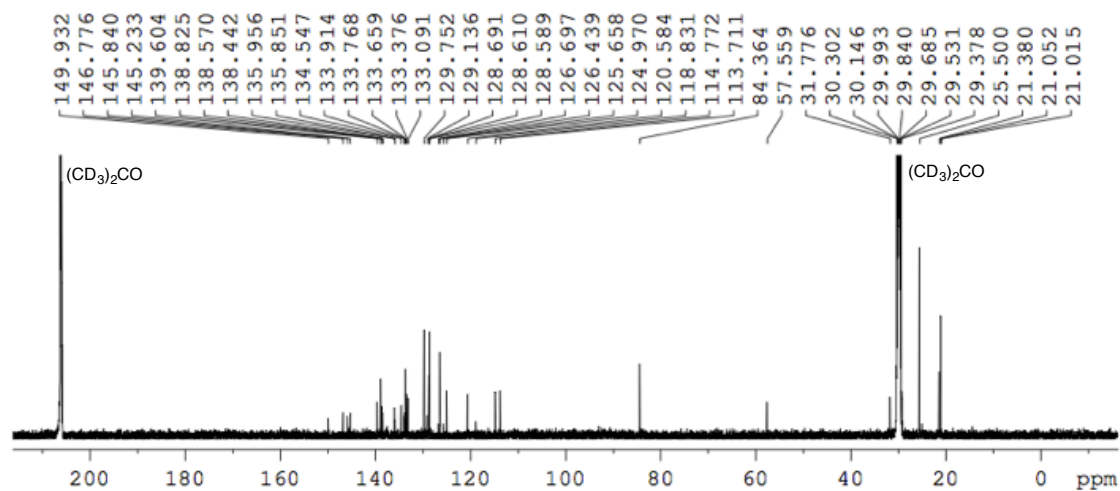

**Fig S19.**  $^{13}\text{C}$  NMR spectrum of **8** in acetone- $d_6$ .

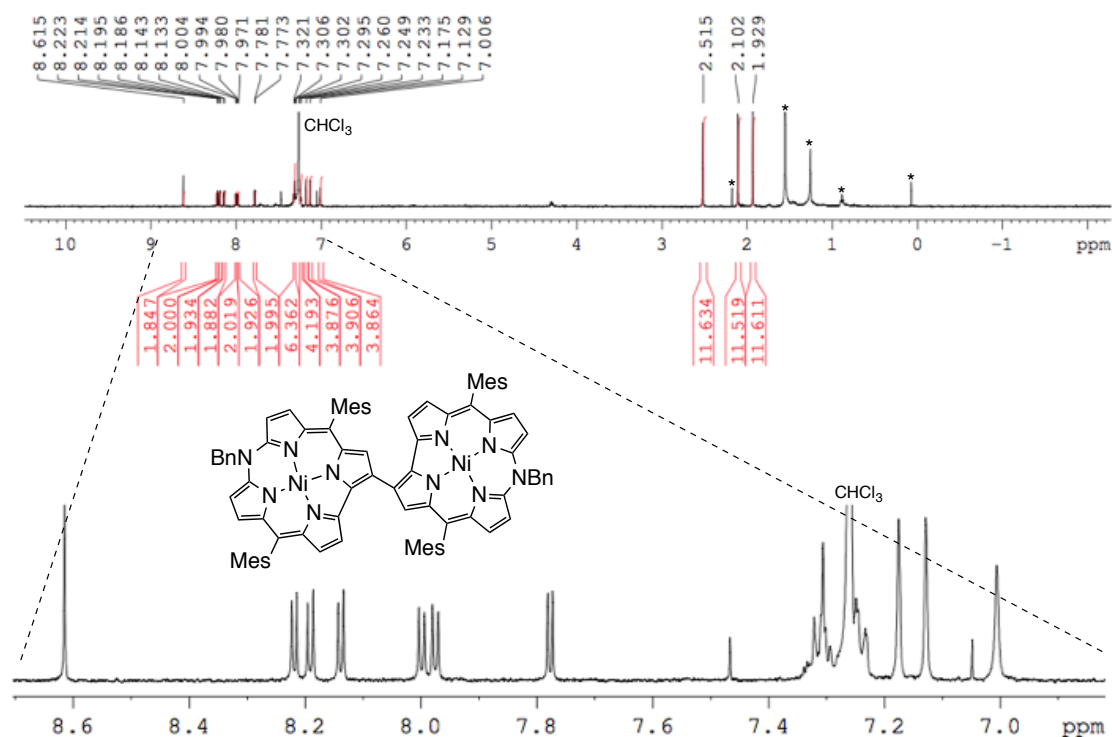

**Fig S20.**  $^1\text{H}$  NMR spectrum of **9** in  $\text{CDCl}_3$ .

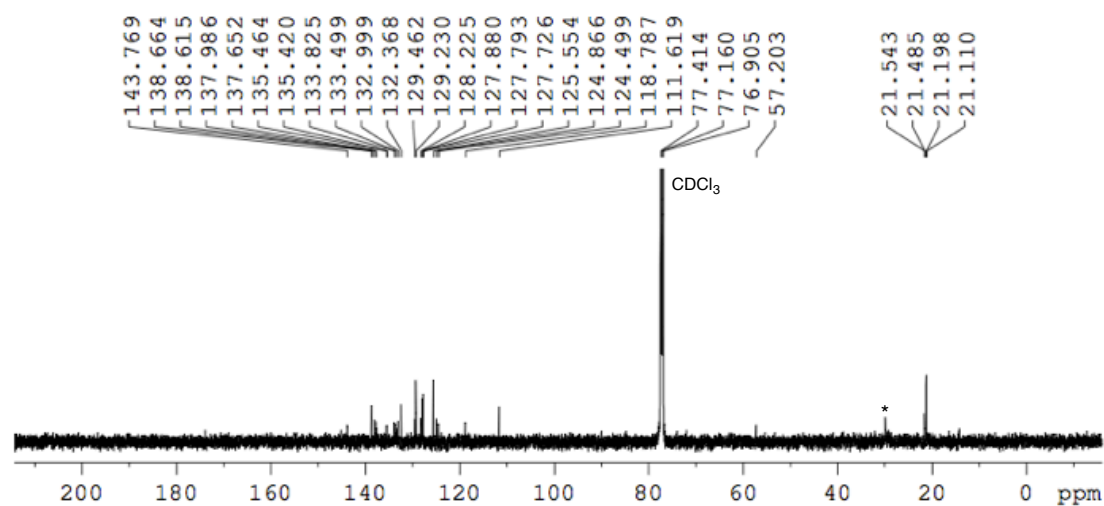

**Fig S21.**  $^{13}\text{C}$  NMR spectrum of **9** in  $\text{CDCl}_3$ .



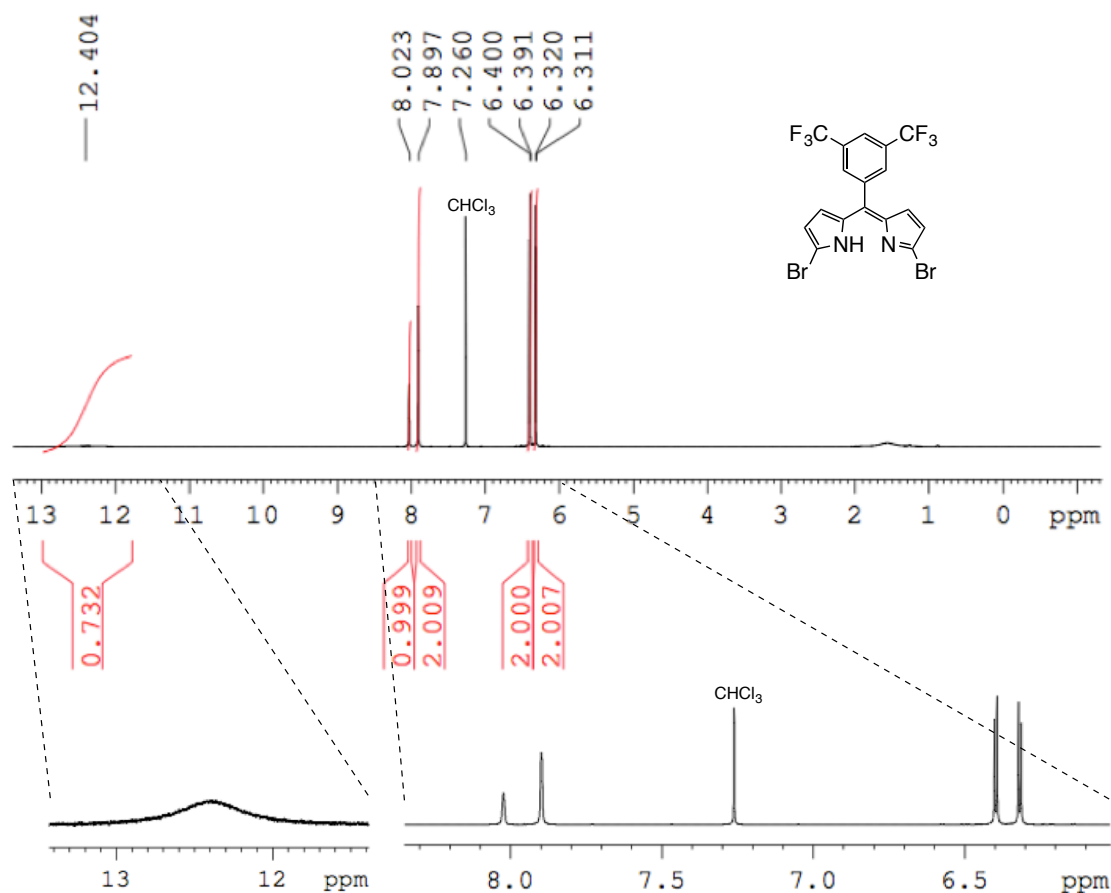

**Fig S22.** <sup>1</sup>H NMR spectrum of *meso*-3,5-bis(trifluoromethyl)phenyl- $\alpha,\alpha'$ -dibromodipyrin in CDCl<sub>3</sub>.

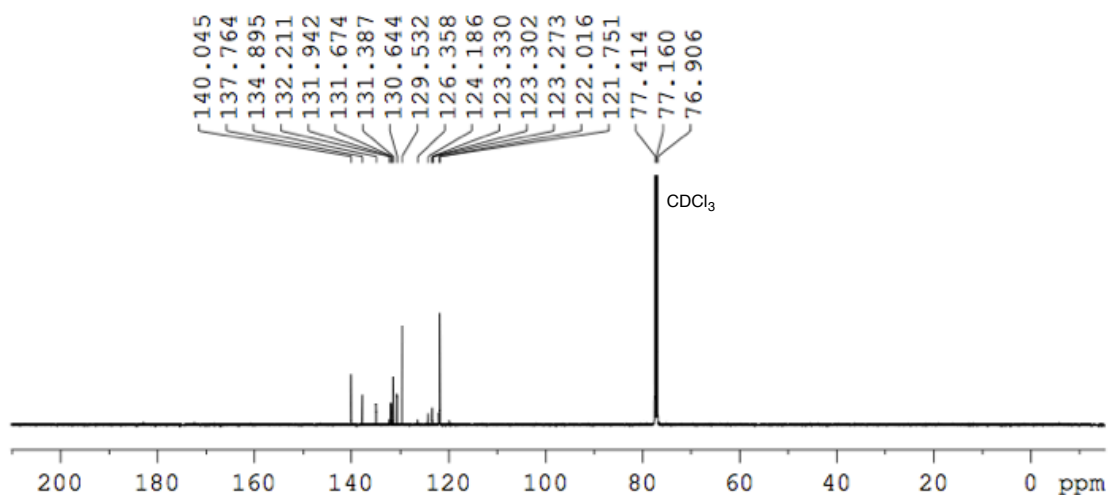

**Fig S23.** <sup>13</sup>C NMR spectrum of *meso*-3,5-bis(trifluoromethyl)phenyl- $\alpha,\alpha'$ -dibromodipyrin in CDCl<sub>3</sub>.

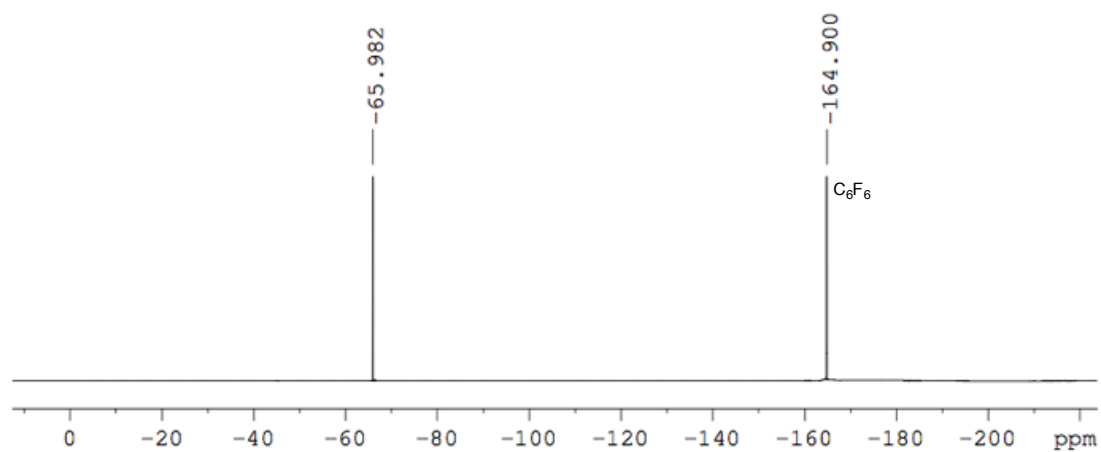

**Fig S24.**  $^{19}\text{F}$  NMR spectrum of *meso*-3,5-bis(trifluoromethyl)phenyl- $\alpha,\alpha'$ -dibromodipyrin in  $\text{CDCl}_3$ .

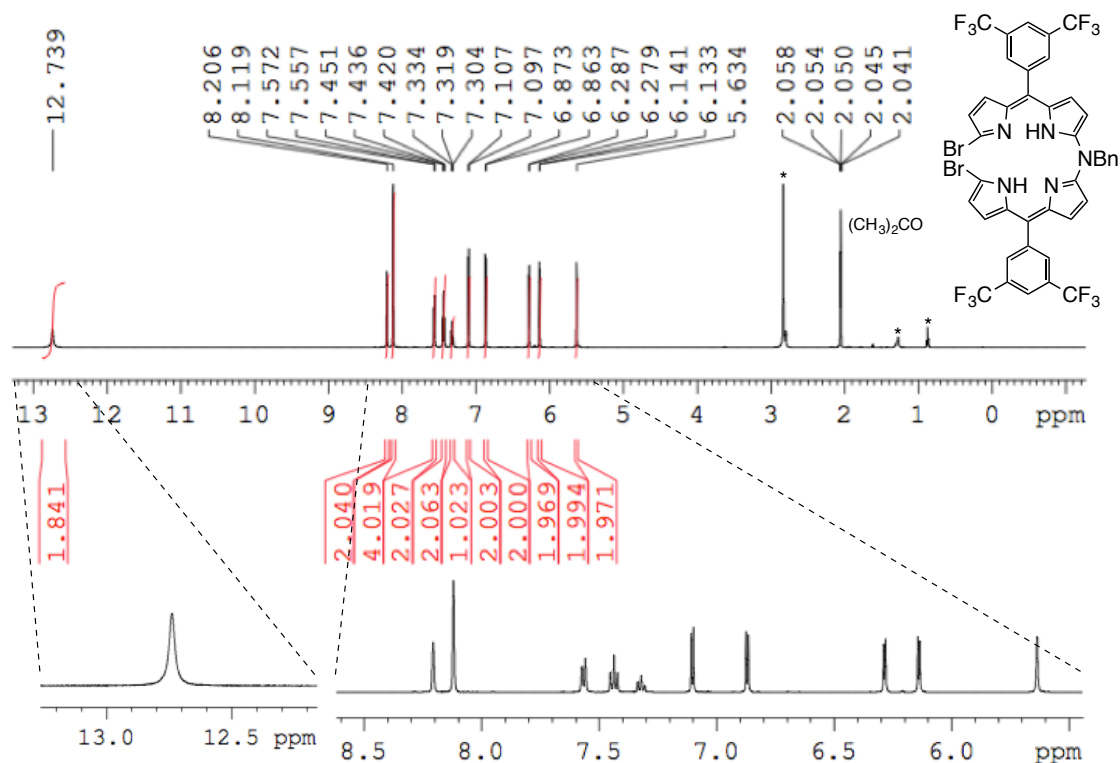

**Fig S25.** <sup>1</sup>H NMR spectrum of *N,N*-bis(*meso*-3,5-bis(trifluoromethyl)phenyl)-1-bromodipyrrin-9-yl)-*N*-benzylamine in acetone-*d*<sub>6</sub>.

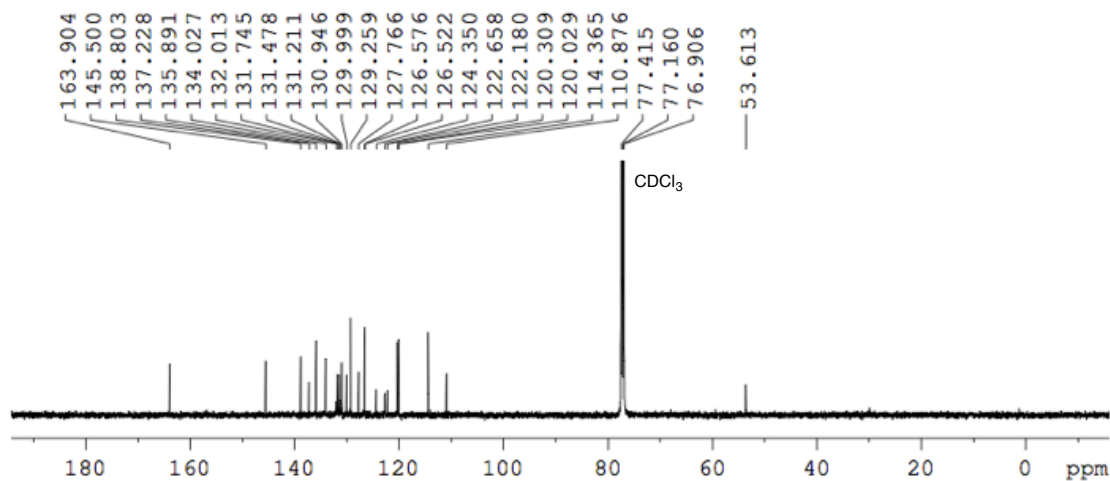

**Fig S26.** <sup>13</sup>C NMR spectrum of *N,N*-bis(*meso*-3,5-bis(trifluoromethyl)phenyl)-1-bromodipyrrin-9-yl)-*N*-benzylamine in CDCl<sub>3</sub>.

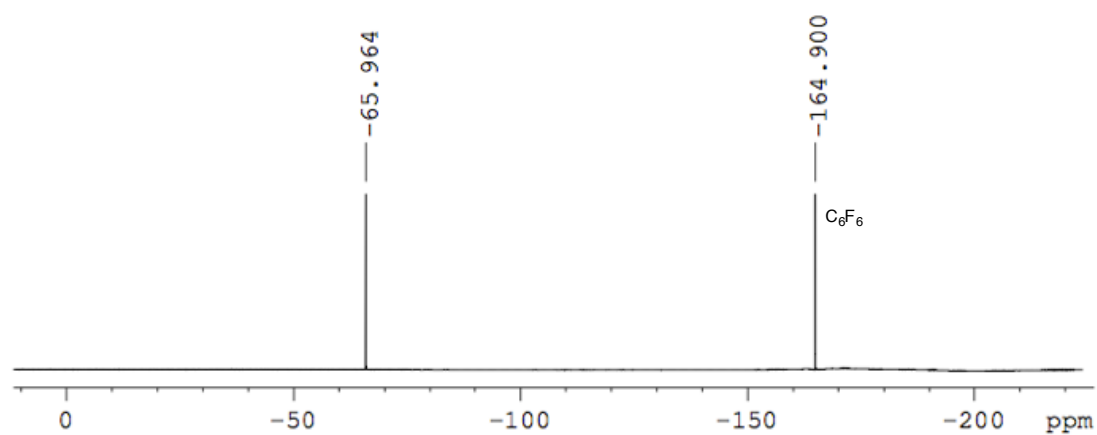

**Fig S27.**  $^{19}\text{F}$  NMR spectrum of  $N,N$ -bis(*meso*-3,5-bis(trifluoromethyl)phenyl)-1-bromodipyrin-9-yl)-  $N$ -benzylamine in  $\text{CDCl}_3$ .

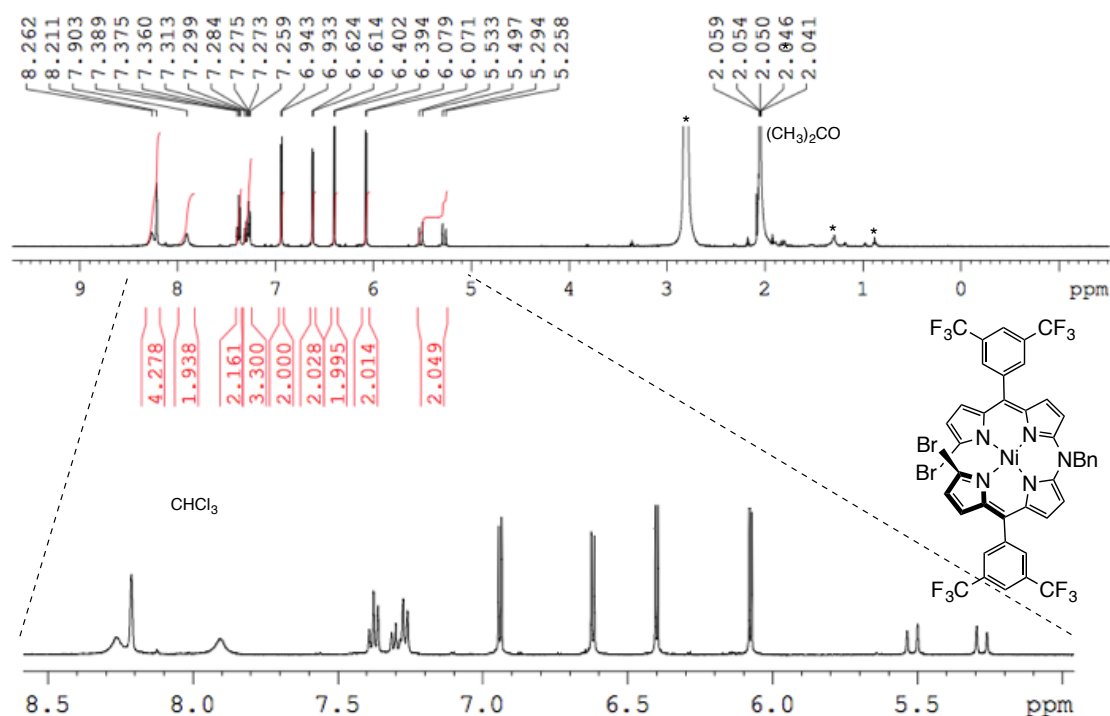

**Fig S28.** <sup>1</sup>H NMR spectrum of *N,N*-Bis(*meso*-3,5-bis(trifluoromethyl)phenyl)-1-bromodipyrrin-9-yl)- *N*-benzylamine Ni complex in acetone-*d*<sub>6</sub>.

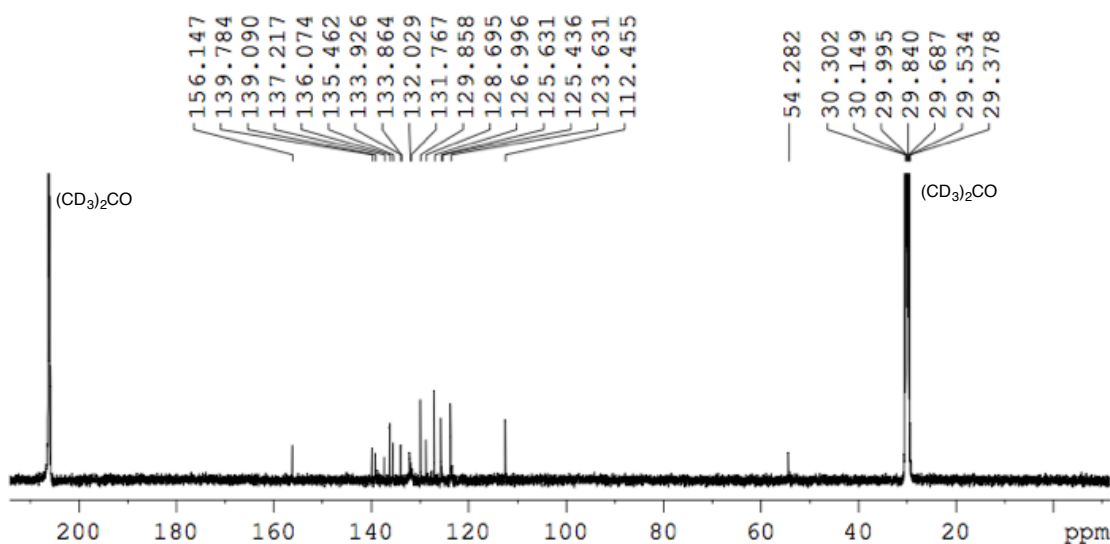

**Fig S29.** <sup>13</sup>C NMR spectrum of *N,N*-Bis(*meso*-3,5-bis(trifluoromethyl)phenyl)-1-bromodipyrrin-9-yl)- *N*-benzylamine Ni complex in acetone-*d*<sub>6</sub>.

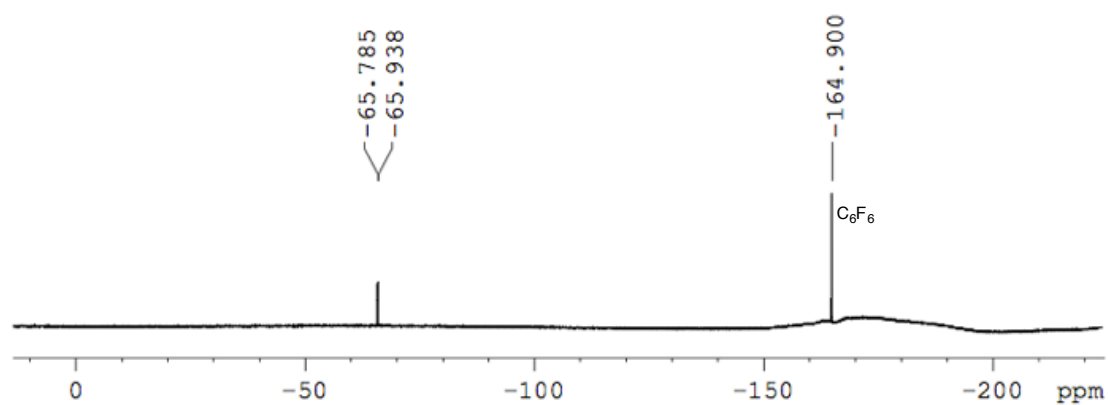

**Fig S30.**  $^{19}\text{F}$  NMR spectrum of *N,N*-bis(*meso*-3,5-bis(trifluoromethyl)phenyl)-1-bromodipyrin-9-yl)-*N*-benzylamine Ni complex in  $\text{CDCl}_3$ .

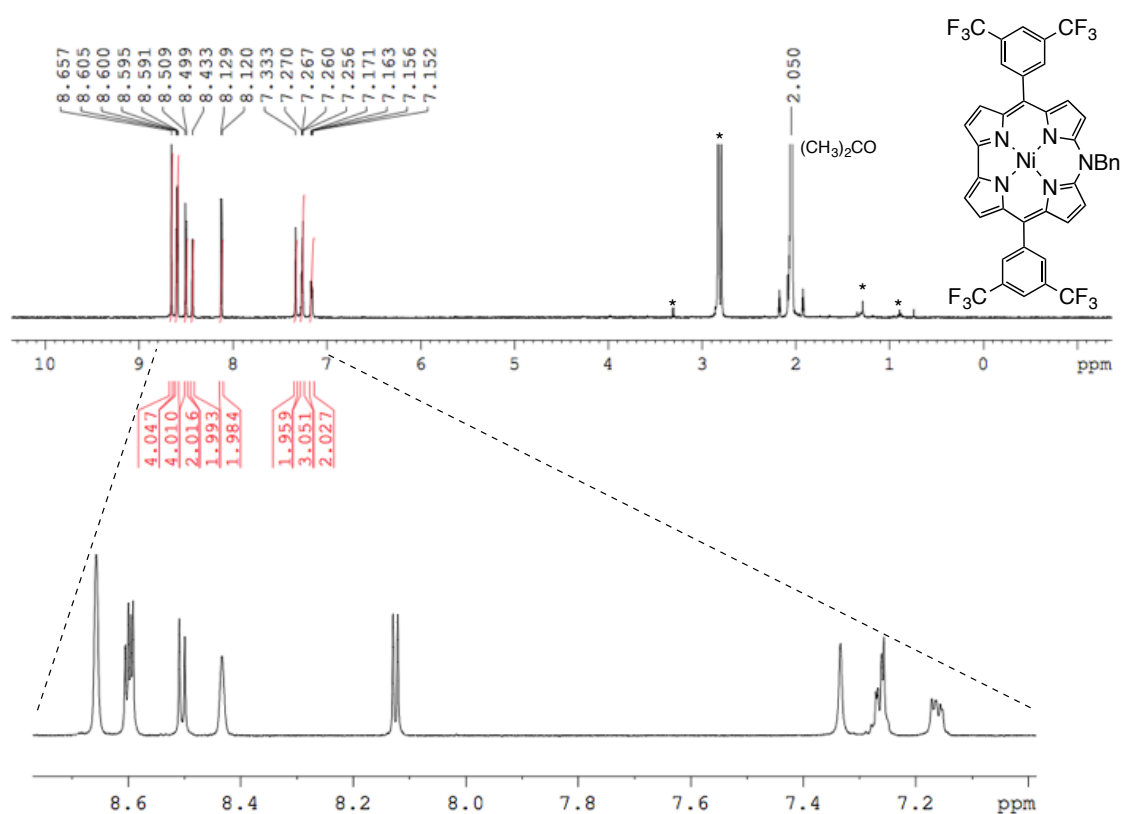

**Fig S31.**  $^1\text{H}$  NMR spectrum of 5,15-(3,5-bis(trifluoromethyl)phenyl)-10-azacorrole in acetone- $d_6$ .

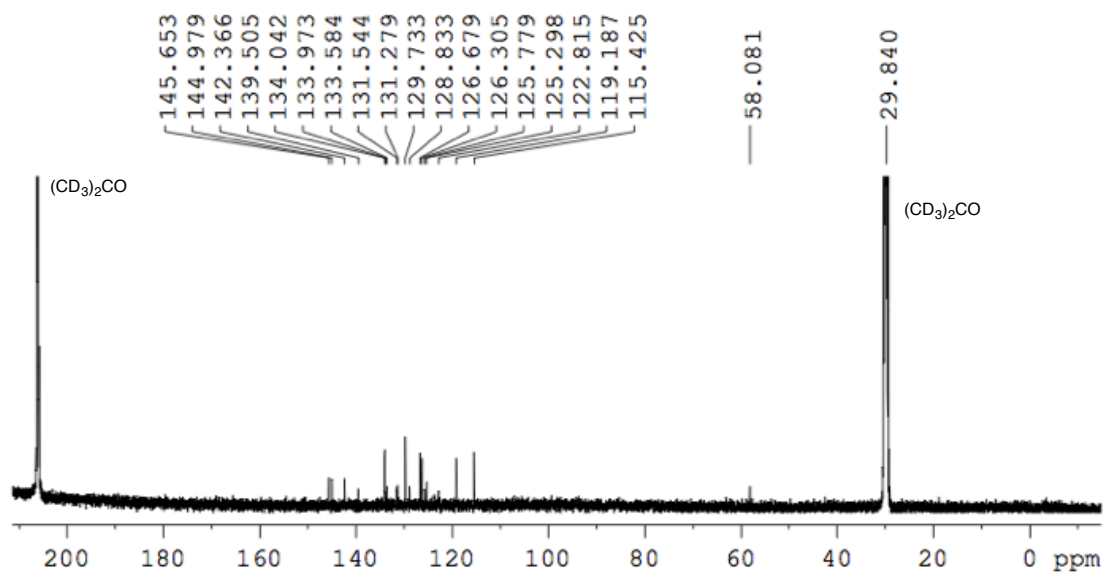

**Fig S32.**  $^{13}\text{C}$  NMR spectrum of 5,15-(3,5-bis(trifluoromethyl)phenyl)-10-azacorrole in acetone- $d_6$ .

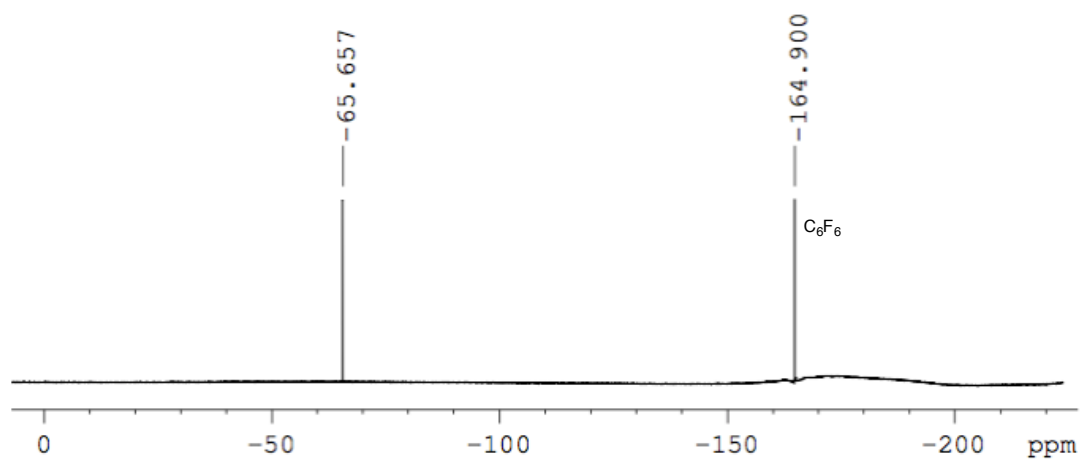

**Fig S33.**  $^{19}\text{F}$  NMR spectrum of 5,15-(3,5-bis(trifluoromethyl)phenyl)-10-azacorrole in  $\text{CDCl}_3$ .

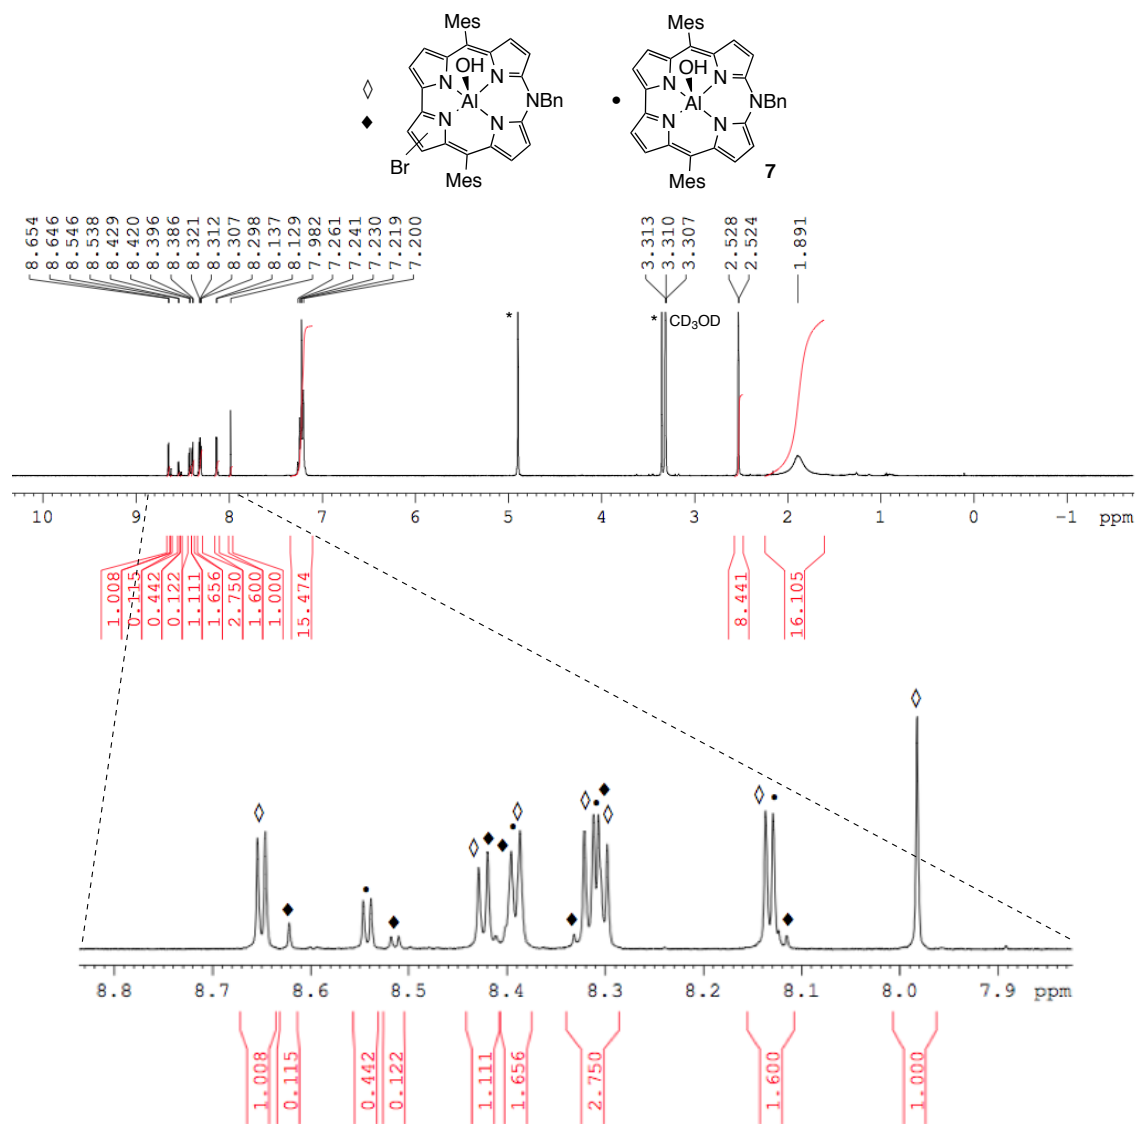

**Fig S34.**  $^1\text{H}$  NMR spectra of the mixture obtained by the reaction with  $\text{AlCl}_3$  in  $\text{CD}_2\text{Cl}_2$ .



## Cyclic Voltammetry

The cyclic voltammogram and differential-pulse voltammogram of **5** and **7** were recorded on ALS electrochemical analyser 612C. Measurements were performed in freshly distilled dichloromethane with tetrabutylammonium hexafluorophosphate as electrolyte. A three-electrode system was used and consisted of a platinum working electrode, a platinum wire and Ag/AgClO<sub>4</sub> as the reference electrode. The scan rate was 100 mVs<sup>-1</sup>. The measurement was performed under nitrogen atmosphere. All potentials are referenced to the potential of ferrocene/ferrocenium cation couple.

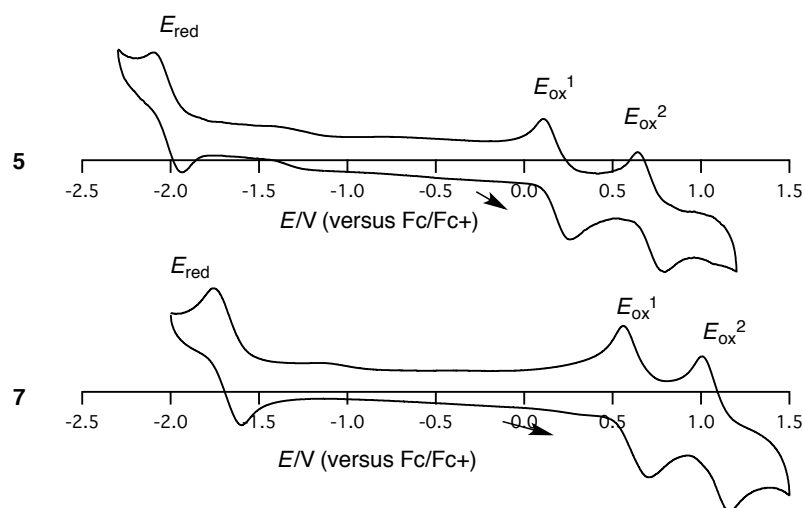

**Fig. S35** Cyclic voltammograms of **5** and **7**.

**Table S1.** Results of electrochemical measurement for **5** and **7**.<sup>a</sup>

| Compound | $E_{\text{red}}$ | $E_{\text{ox}}^1$ | $E_{\text{ox}}^2$ | $\Delta E^b$ |
|----------|------------------|-------------------|-------------------|--------------|
| <b>5</b> | -2.01            | 0.181             | 0.718             | 2.19         |
| <b>7</b> | -1.89            | 0.426             | 0.871             | 2.33         |

a: unit: V, b:  $\Delta E = E_{\text{ox}}^1 - E_{\text{red}}$

## **Theoretical Calculations**

All calculations were carried out using the Gaussian 09 program.<sup>2</sup> The geometries of all compounds for the mechanistic investigations were optimized by the DFT method with Zhao's M06-2X functional<sup>3</sup> and the 6-31G(d) basis set for C, H, N, and Br atoms and SDD for Ni. Mesityl substituents were replaced with hydrogen to reduce the calculation cost. The structures of the intermediates and transition states were obtained by hand-guesses. Full optimizations were performed without any symmetry restriction with the M06-2X/631SDD method. Zero-point energy and thermal energy corrections were conducted for all optimized structures, and the sums of electronic and thermal free energies were obtained. The zero-point energies were not scaled, and the enthalpic corrections were made at 298.150 K. Each transition state gave single imaginary frequency and IRC calculations supported the transition structure.

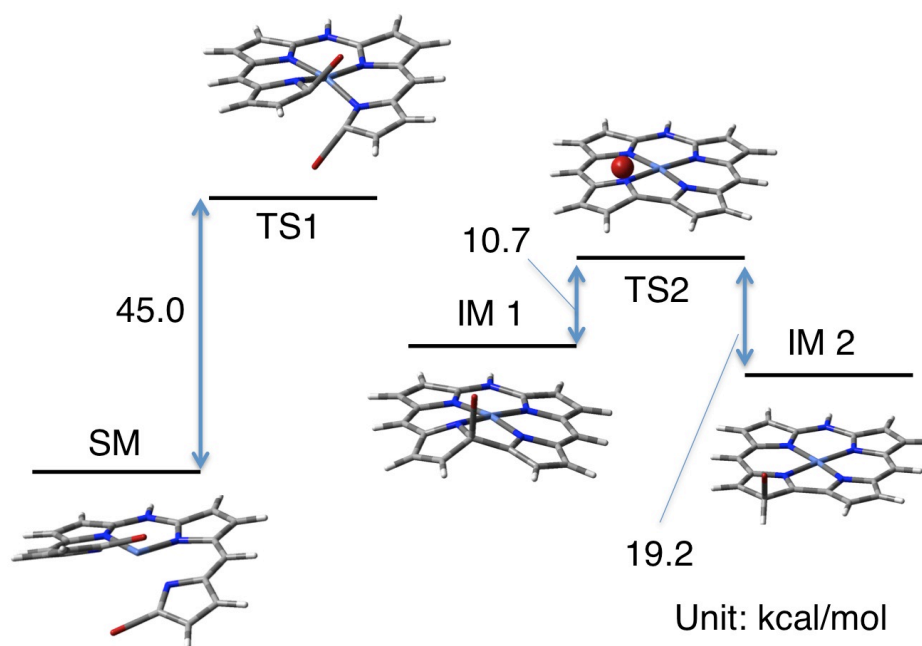

**Fig S36.** Energy profile for electrocyclization and 1,2-migration by DFT calculations. The calculations were performed at the M06-2X/6-31G(d) level.

**Table S2.** Summary of calculations on the electrocyclization/1,2-migration process of **3Ni**.

|                   | <b>3Ni</b>   | <b>TS1</b>   |
|-------------------|--------------|--------------|
| Energy (au)       | −6279.613308 | −6279.542662 |
| Total Energy (au) | −6279.662114 | −6279.590389 |
| $E_a$ (kcal/mol)  |              | 45.0         |

  

|                   | <b>IM I</b>  | <b>TS2</b>   | <b>IM II</b> |
|-------------------|--------------|--------------|--------------|
| Energy (au)       | −3707.917140 | −3707.900435 | −3707.930149 |
| Total Energy (au) | −3707.962407 | −3707.945341 | −3707.975947 |
| $E_a$ (kcal/mol)  |              | 10.7         |              |

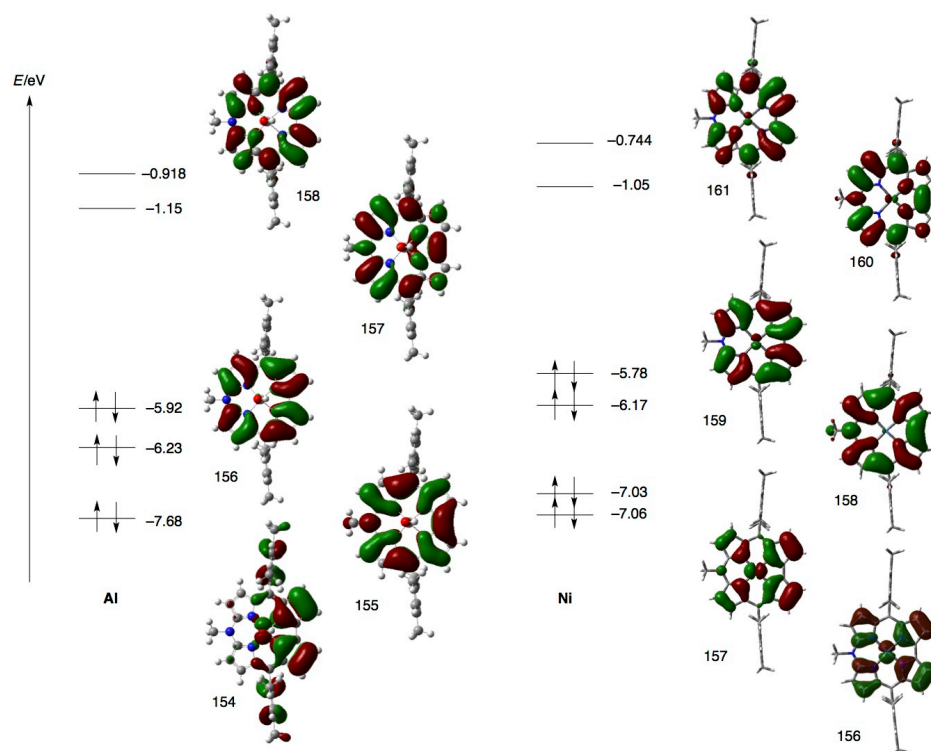

**Fig S37.** MO diagrams of  $\text{Al}^{\text{III}}$  azacorrolo **7** and  $\text{Ni}^{\text{II}}$  azacorrolo **5**.

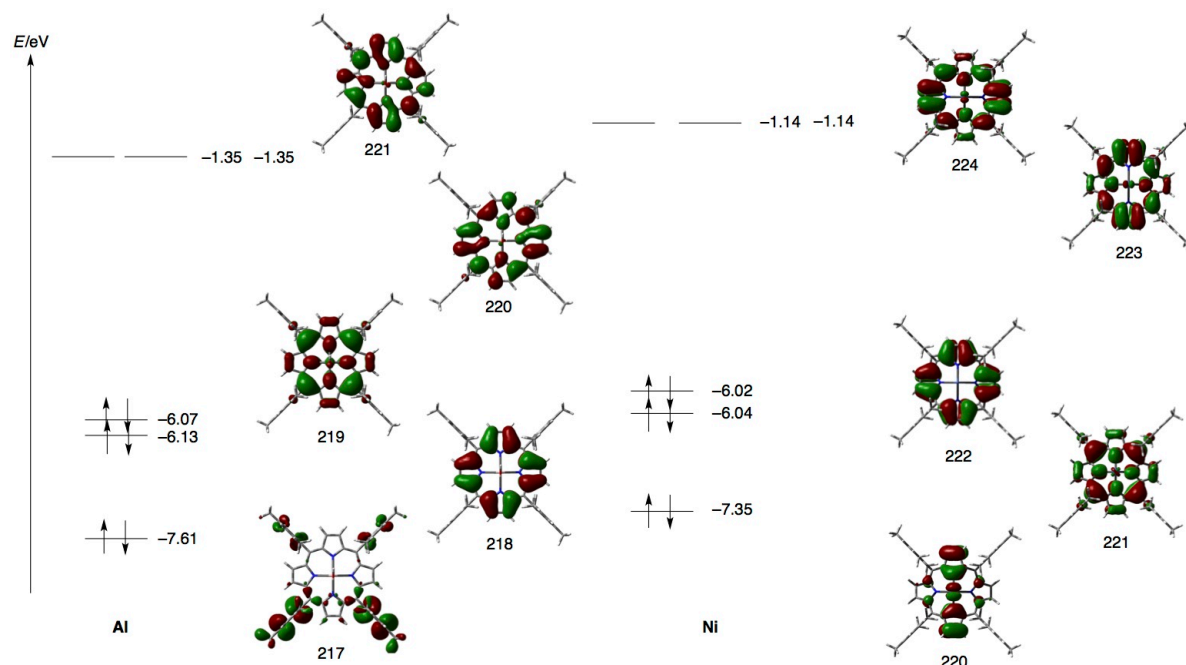

**Fig S38.** MO diagrams of  $\text{Al}^{\text{III}}$  TPP and  $\text{Ni}^{\text{II}}$  TPP.

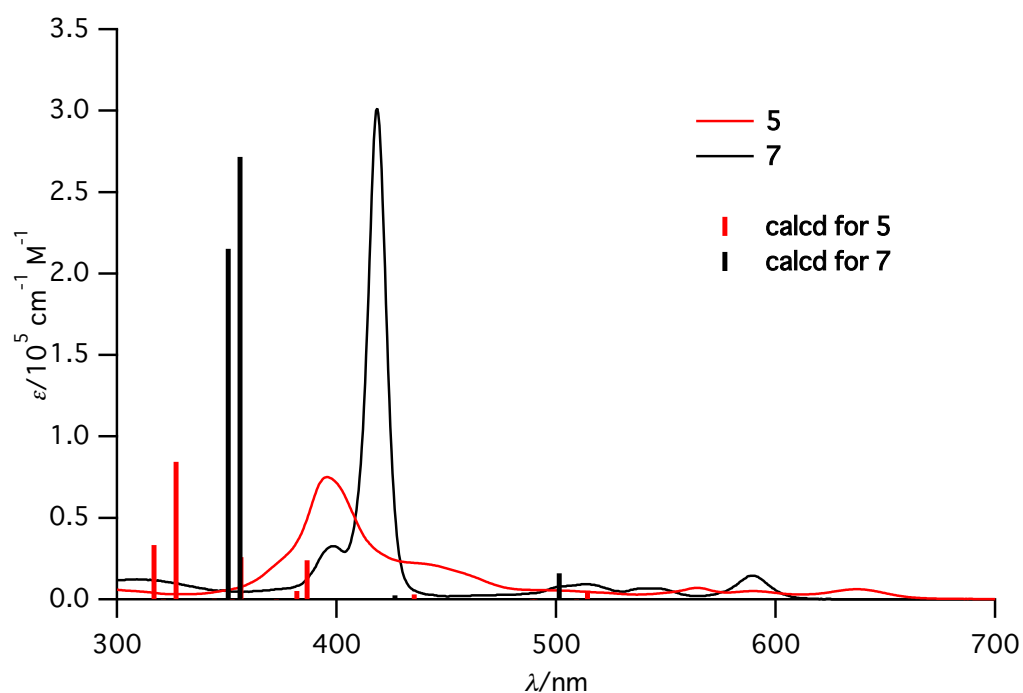

**Fig S39.** Calculated oscillator strengths of **5** and **7**.

**Table S3.** Summary of calculated oscillator strengths for compounds **5** and **7**.

| compound  | wavelength<br>(nm) | oscillator<br>strength | component | population |
|-----------|--------------------|------------------------|-----------|------------|
| 5         | 514.26             | 0.0542                 | 158 → 161 | −0.27757   |
|           |                    |                        | 159 → 160 | 0.63241    |
|           | 435.36             | 0.0313                 | 157 → 160 | 0.19131    |
|           |                    |                        | 158 → 160 | 0.30206    |
|           |                    |                        | 159 → 161 | 0.59289    |
|           |                    |                        |           |            |
|           | 386.53             | 0.2394                 | 157 → 160 | −0.41823   |
|           |                    |                        | 158 → 160 | 0.52008    |
|           |                    |                        | 159 → 161 | −0.10831   |
|           | 326.93             | 0.8454                 | 156 → 160 | −0.44106   |
| 158 → 161 |                    |                        | 0.45884   |            |
| 159 → 160 |                    |                        | 0.27599   |            |
| 7         | 501.39             | 0.0535                 | 155 → 158 | −0.36015   |
|           |                    |                        | 156 → 158 | 0.60061    |
|           | 426.54             | 0.0084                 | 155 → 157 | 0.44108    |
|           |                    |                        | 156 → 158 | 0.54352    |
|           | 356.06             | 0.9053                 | 155 → 157 | 0.54688    |
|           |                    |                        | 156 → 158 | −0.43930   |
|           | 350.61             | 0.7176                 | 154 → 157 | 0.13544    |
|           |                    |                        | 155 → 158 | 0.57919    |
| 156 → 157 |                    |                        | 0.35471   |            |

<sup>1</sup> Matano, Y.; Shibano, T.; Nakano, H.; Imahori, H. *Chem. Eur. J.* **2012**, *18*, 6208.

<sup>2</sup> Frisch, M. J.; Trucks, G. W.; Schlegel, H. B.; Scuseria, G. E.; Robb, M. A.; Cheeseman, J. R.; Scalmani, G.; Barone, V.; Mennucci, B.; Petersson, G. A.; Nakatsuji, H.; Caricato, M.; Li, X.; Hratchian, H. P.; Izmaylov, A. F.; Bloino, J.; Zheng, G.; Sonnenberg, J. L.; Hada, M.; Ehara, M.; Toyota, K.; Fukuda, R.; Hasegawa, J.; Ishida, M.; Nakajima, T.; Honda, Y.; Kitao, O.; Nakai, H.; Vreven, T.; Montgomery, J. A., Jr.; Peralta, J. E.; Ogliaro, F.; Bearpark, M.; Heyd, J. J.; Brothers, E.; Kudin, K. N.; Staroverov, V. N.; Kobayashi, R.; Normand, J.; Raghavachari, K.; Rendell, A.; Burant, J. C.; Iyengar, S. S.; Tomasi, J.; Cossi, M.; Rega, N.; Millam, J. M.; Klene, M.; Knox, J. E.; Cross, J. B.; Bakken, V.; Adamo, C.; Jaramillo, J.; Gomperts, R.; Stratmann, R. E.; Yazyev, O.; Austin, A. J.; Cammi, R.; Pomelli, C.; Ochterski, J. W.; Martin, R. L.; Morokuma, K.; Zakrzewski, V. G.; Voth, G. A.; Salvador, P.; Dannenberg, J. J.; Dapprich, S.; Daniels, A. D.; Farkas, Ö.; Foresman, J. B.; Ortiz, J. V.; Cioslowski, J.; Fox, D. J. Gaussian, Inc., Wallingford CT, **2009**.

<sup>3</sup> Zhao, Y.; Truhlar, D. G., *Theor. Chem. Acc.* **2008**, *120*, 215.
